# Supplementary material for: STAG2 promotes the myelination transcriptional program in oligodendrocytes
Source: PubMed Central journal article supplement (PMC9439679; doi:10.7554/elife.77848), 2022-08-12
Supplement: elife-77848-fig1-data1.pdf [file elife-77848-fig1-data1.pdf]

**Figure 1B**

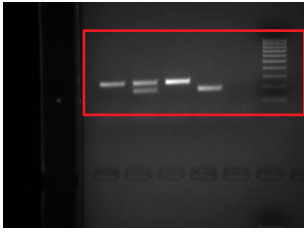

**Figure 1C**

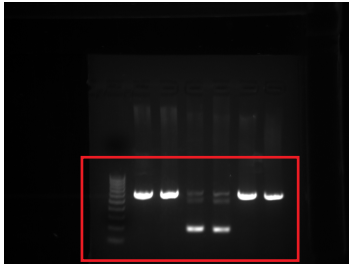

**Figure 1D**

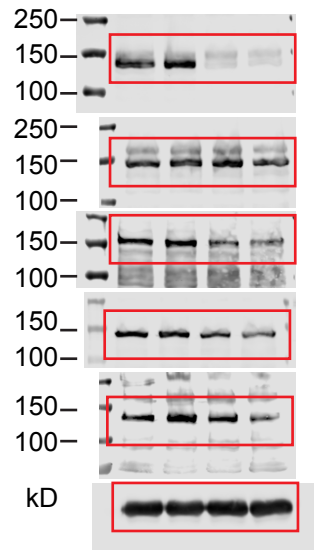

**Figure 1D**

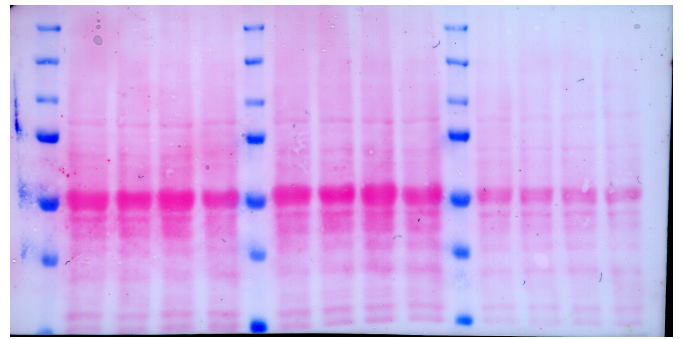

Ponceau S
