# Supplementary material for: STAG2 promotes the myelination transcriptional program in oligodendrocytes
Source: eLife journal article supplement (doi:10.7554/elife.77848), 2022-08-12

**Figure 1—  
Figure Supplement 2B**

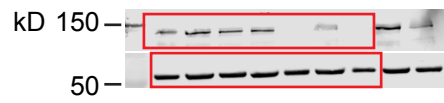

**Figure 1—  
Figure Supplement 2C**

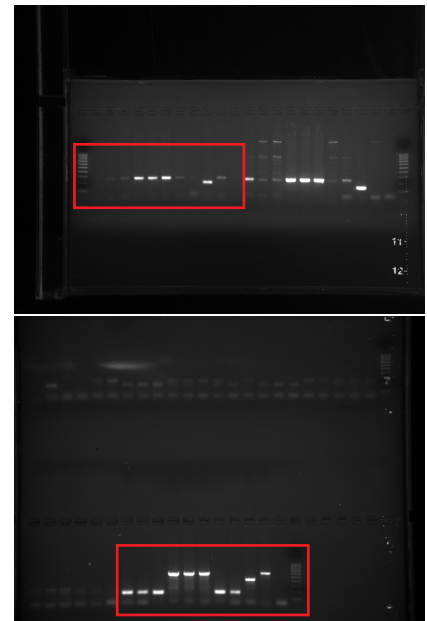

Supplement: fig1-figsupp2-data1 [file elife-77848-fig1-figsupp2-data1-v2.pdf]
