# Supplementary material for: STAG2 promotes the myelination transcriptional program in oligodendrocytes
Source: eLife. 2022 Aug 12;11:e77848. doi: 10.7554/eLife.77848 (PMC9439679; doi:10.7554/eLife.77848)
Supplement: Supplementary file 1. [file elife-77848-supp1.xlsx]

## Sheet: Sheet1
Ingenuity Canonical Pathways	-log(p-value)	zScore	Ratio	Molecules
Superpathway of Cholesterol Biosynthesis	6.87	-3	0.321	CYP51A1,DHCR7,FDPS,HMGCS1,IDI1,MSMO1,MVD,NSDHL,SC5D
Atherosclerosis Signaling	5.23		0.135	ABHD3,ALOX12B,ALOX5,COL2A1,COL5A3,ICAM1,IL33,ITGA4,LCAT,PLA2G3,PLA2G4A,PLA2G4E,PLA2G5,RBP4
Cholesterol Biosynthesis I	4.46	-2.23607	0.385	CYP51A1,DHCR7,MSMO1,NSDHL,SC5D
Cholesterol Biosynthesis II (via 24,25-dihydrolanosterol)	4.46	-2.23607	0.385	CYP51A1,DHCR7,MSMO1,NSDHL,SC5D
Cholesterol Biosynthesis III (via Desmosterol)	4.46	-2.23607	0.385	CYP51A1,DHCR7,MSMO1,NSDHL,SC5D
Role of Osteoblasts, Osteoclasts and Chondrocytes in Rheumatoid Arthritis	4.36		0.0913	ADAMTS4,ALPL,DKKL1,FOS,FZD10,FZD2,FZD7,IL1RAP,IL33,ITGB3,MMP14,PIK3C2B,SFRP5,SP7,WIF1,WNT10B,WNT2,WNT7A,WNT7B
Hepatic Fibrosis Signaling Pathway	3.9	-1.2792	0.0729	ACVR1C,COL2A1,COL5A3,CYBB,FOS,FZD10,FZD2,FZD7,ICAM1,IL1RAP,IL33,ITGA4,ITGB3,MYC,MYL4,PIK3C2B,PPARG,RHOG,RHOU,RRAS2,TF,WNT10B,WNT2,WNT7A,WNT7B
Eicosanoid Signaling	3.25	0.377964	0.136	ABHD3,ALOX12B,ALOX5,LCAT,PLA2G3,PLA2G4A,PLA2G4E,PLA2G5
PCP pathway	3.25	-1.41421	0.136	FZD10,FZD2,FZD7,JUNB,WNT10B,WNT2,WNT7A,WNT7B
Zymosterol Biosynthesis	3.21		0.5	CYP51A1,MSMO1,NSDHL
ERK/MAPK Signaling	3.12	1.06904	0.0829	DUSP1,ELF4,FOS,ITGA4,MYC,PIK3C2B,PLA2G3,PLA2G4A,PLA2G4E,PLA2G5,PPARG,PPP1R14A,PPP1R3C,RRAS2,STAT1
Human Embryonic Stem Cell Pluripotency	3.01		0.0923	FZD10,FZD2,FZD7,LEFTY2,NTF3,PIK3C2B,S1PR5,TDGF1,WNT10B,WNT2,WNT7A,WNT7B
Osteoarthritis Pathway	2.97	-1.60357	0.0802	ADAMTS4,ALPL,ANXA2,CASR,COL2A1,DDIT4,FZD10,FZD2,FZD7,IL1RAP,ITGA4,PPARG,PTHLH,RBP4,SP7
Phospholipases	2.79	-0.377964	0.13	ABHD3,LCAT,LIPG,PLA2G3,PLA2G4A,PLA2G4E,PLA2G5
Superpathway of Geranylgeranyldiphosphate Biosynthesis I (via Mevalonate)	2.75	-2	0.235	FDPS,HMGCS1,IDI1,MVD
LXR/RXR Activation	2.69	0	0.0952	C3,C4A/C4B,CYP51A1,IL1RAP,IL33,LCAT,LDLR,RBP4,SCD,TF
Role of Macrophages, Fibroblasts and Endothelial Cells in Rheumatoid Arthritis	2.58		0.0657	ADAMTS4,DKKL1,FCGR1A,FOS,FZD10,FZD2,FZD7,ICAM1,IL1RAP,IL33,MYC,PIK3C2B,RRAS2,SFRP5,WIF1,WNT10B,WNT2,WNT7A,WNT7B
Role of Wnt/GSK-3Œ≤ Signaling in the Pathogenesis of Influenza	2.44	-1.88982	0.113	FZD10,FZD2,FZD7,WNT10B,WNT2,WNT7A,WNT7B
Hepatic Fibrosis / Hepatic Stellate Cell Activation	2.36		0.0743	COL15A1,COL20A1,COL24A1,COL27A1,COL2A1,COL5A3,ICAM1,IGFBP3,IGFBP4,IL1RAP,MYL4,STAT1,TGFA
Colorectal Cancer Metastasis Signaling	2.32	-1.5	0.0667	FOS,FZD10,FZD2,FZD7,MMP14,MMP15,MYC,PIK3C2B,RHOG,RHOU,RRAS2,STAT1,WNT10B,WNT2,WNT7A,WNT7B
Acetate Conversion to Acetyl-CoA	2.23		0.5	ACSS2,ACSS3
Trans, trans-farnesyl Diphosphate Biosynthesis	2.23		0.5	FDPS,IDI1
Glioblastoma Multiforme Signaling	2.23	-2.3094	0.0745	FZD10,FZD2,FZD7,MYC,PIK3C2B,RHOG,RHOU,RRAS2,WNT10B,WNT2,WNT7A,WNT7B
Basal Cell Carcinoma Signaling	2.22	-1.88982	0.103	FZD10,FZD2,FZD7,WNT10B,WNT2,WNT7A,WNT7B
Iron homeostasis signaling pathway	2.22		0.082	ALAS2,CD163,CYBRD1,HBA1/HBA2,HBB,Hbb-b1,Hbb-b2,SLC11A1,STEAP3,TF
Wnt/Œ≤-catenin Signaling	2.21	0	0.0741	ACVR1C,DKKL1,FZD10,FZD2,FZD7,MYC,SFRP5,WIF1,WNT10B,WNT2,WNT7A,WNT7B
HOTAIR Regulatory Pathway	2.19	0.301511	0.0769	ICAM1,MMP14,MMP15,MYC,PIK3C2B,VIM,WIF1,WNT10B,WNT2,WNT7A,WNT7B
FXR/RXR Activation	2.17		0.0857	C3,C4A/C4B,CYP27A1,IL33,LCAT,PPARG,RBP4,SDC1,TF
Mevalonate Pathway I	2.13		0.231	HMGCS1,IDI1,MVD
Phagosome Formation	2.12		0.0841	C3AR1,FCGR1A,FCGR2B,ITGA4,MRC1,PIK3C2B,RHOG,RHOU,SCARA3
p38 MAPK Signaling	2.12	0.333333	0.0841	DUSP1,IL1RAP,IL33,MYC,PLA2G3,PLA2G4A,PLA2G4E,PLA2G5,STAT1
Granulocyte Adhesion and Diapedesis	2.08		0.0743	Ccl9,CLDN11,CLDN14,ICAM1,IL1RAP,IL33,ITGA4,ITGB3,MMP14,MMP15,SDC1
MIF Regulation of Innate Immunity	2.06	1.34164	0.125	FOS,PLA2G3,PLA2G4A,PLA2G4E,PLA2G5
Role of MAPK Signaling in the Pathogenesis of Influenza	2.05		0.0959	ABHD3,LCAT,PLA2G3,PLA2G4A,PLA2G4E,PLA2G5,RRAS2
Breast Cancer Regulation by Stathmin1	1.99		0.0518	ADRA1A,ADRA2B,APLNR,C3AR1,CASR,CRHR1,DRD5,FZD10,FZD2,FZD7,GPR179,GPR62,GPR83,GRM3,GRM4,LPAR1,OPRK1,OXTR,P2RY1,PIK3C2B,PPP1R14A,PPP1R3C,QRFPR,RRAS2,S1PR5,TACR3,TGFA
GP6 Signaling Pathway	1.95	-1	0.0789	COL15A1,COL20A1,COL24A1,COL27A1,COL2A1,COL5A3,ITGB3,PIK3C2B,RHOG
Role of NANOG in Mammalian Embryonic Stem Cell Pluripotency	1.95		0.0789	FZD10,FZD2,FZD7,PIK3C2B,RRAS2,WNT10B,WNT2,WNT7A,WNT7B
Ovarian Cancer Signaling	1.93		0.0741	BRCA1,FZD10,FZD2,FZD7,PIK3C2B,RRAS2,WNT10B,WNT2,WNT7A,WNT7B
Antioxidant Action of Vitamin C	1.89	0	0.0825	ABHD3,LCAT,PLA2G3,PLA2G4A,PLA2G4E,PLA2G5,SLC2A4,SLC2A5
Interferon Signaling	1.88	2	0.138	IFIT3,IFITM3,ISG15,STAT1
Oxidative Ethanol Degradation III	1.87		0.188	ACSS2,ACSS3,ALDH1A3
Agranulocyte Adhesion and Diapedesis	1.86		0.0692	Ccl9,CD34,CLDN11,CLDN14,ICAM1,IL33,ITGA4,ITGB7,MMP14,MMP15,MYL4
Neuroinflammation Signaling Pathway	1.84	0	0.059	ACVR1C,BACE2,CYBB,FOS,GJB1,ICAM1,IRF7,MAPK15,MFGE8,NTF3,PIK3C2B,PLA2G3,PLA2G4A,PLA2G4E,PLA2G5,STAT1
VEGF Family Ligand-Receptor Interactions	1.82	0.377964	0.0864	FOS,PIK3C2B,PLA2G3,PLA2G4A,PLA2G4E,PLA2G5,RRAS2
Factors Promoting Cardiogenesis in Vertebrates	1.8	-1.89737	0.0709	ACVR1C,FZD10,FZD2,FZD7,MYC,TDGF1,WNT10B,WNT2,WNT7A,WNT7B
Acute Phase Response Signaling	1.79	0	0.0675	C3,C4A/C4B,FOS,IL1RAP,IL33,ITIH2,RBP4,RRAS2,SERPINA3,SERPING1,TF
Complement System	1.78		0.129	C3,C3AR1,C4A/C4B,SERPING1
Dendritic Cell Maturation	1.73	1	0.069	COL2A1,COL5A3,FCGR1A,FCGR2B,ICAM1,IL23A,IL33,PIK3C2B,STAT1,STAT4
MIF-mediated Glucocorticoid Regulation	1.73	1	0.125	PLA2G3,PLA2G4A,PLA2G4E,PLA2G5
Endothelin-1 Signaling	1.62	0.301511	0.0636	ABHD3,FOS,LCAT,MAPK15,MYC,PIK3C2B,PLA2G3,PLA2G4A,PLA2G4E,PLA2G5,RRAS2
Ethanol Degradation IV	1.6		0.15	ACSS2,ACSS3,ALDH1A3
ILK Signaling	1.57	-1.66667	0.0625	FLNC,FOS,ITGB3,ITGB7,LIMS2,MYC,MYL4,PIK3C2B,RHOG,RHOU,VIM
Role of Pattern Recognition Receptors in Recognition of Bacteria and Viruses	1.57	1.34164	0.0682	C3,C3AR1,DDX58,EIF2AK2,IL33,IRF7,Oas1b,OAS2,PIK3C2B
Clathrin-mediated Endocytosis Signaling	1.55		0.0621	AP1G2,ARPC1B,FGF7,ITGB3,ITGB7,LDLR,LDLRAP1,PIK3C2B,RBP4,SH3GL3,TF
VDR/RXR Activation	1.5		0.0811	CASR,IGFBP3,KLF4,KLK6,SERPINB1,THBD
Methylthiopropionate Biosynthesis	1.49		1	ADI1
Intrinsic Prothrombin Activation Pathway	1.48		0.105	COL2A1,COL5A3,KLK6,THBD
UVA-Induced MAPK Signaling	1.46		0.0729	FOS,PARP12,PARP14,PARP9,PIK3C2B,RRAS2,STAT1
Systemic Lupus Erythematosus In B Cell Signaling Pathway	1.43	0.27735	0.056	FCGR2B,FOS,IFIT3,IL33,IRF7,ISG15,ISG20,MYC,PIK3AP1,PIK3C2B,RASGRP3,RRAS2,STAT1
Signaling by Rho Family GTPases	1.42	-1.38675	0.0558	ARPC1B,CDC42EP2,CDH15,CYBB,DES,FOS,GFAP,ITGA4,MYL4,PIK3C2B,RHOG,RHOU,VIM
Oleate Biosynthesis II (Animals)	1.41		0.2	SCD,Scd2
Ethanol Degradation II	1.39		0.125	ACSS2,ACSS3,ALDH1A3
Apelin Liver Signaling Pathway	1.35		0.12	APLNR,COL2A1,COL5A3
Virus Entry via Endocytic Pathways	1.34		0.0686	AP1G2,FLNC,ITGA4,ITGB3,ITGB7,PIK3C2B,RRAS2
Ketogenesis	1.33		0.182	BDH2,HMGCS1
G-Protein Coupled Receptor Signaling	1.33		0.053	ADRA1A,ADRA2B,APLNR,CRHR1,DRD5,DUSP1,ENPP6,GRM3,GRM4,LPAR1,OPRK1,PDE8A,PIK3C2B,RRAS2
HIF1Œ± Signaling	1.32		0.068	MAPK15,MMP14,MMP15,PIK3C2B,RRAS2,SLC2A4,SLC2A5
Thrombopoietin Signaling	1.29	0.447214	0.0794	FOS,MYC,PIK3C2B,RRAS2,STAT1
IL-23 Signaling Pathway	1.28	0	0.0909	IL23A,PIK3C2B,RORC,STAT4
Synaptic Long Term Depression	1.24	-1.26491	0.0568	ABHD3,CRHR1,GRM3,GRM4,LCAT,PLA2G3,PLA2G4A,PLA2G4E,PLA2G5,RRAS2
PDGF Signaling	1.23	0.816497	0.0698	EIF2AK2,FOS,MYC,PIK3C2B,RRAS2,STAT1
Pregnenolone Biosynthesis	1.2		0.154	CYP11A1,CYP27A1
Glycine Degradation (Creatine Biosynthesis)	1.2		0.5	GAMT
Actin Nucleation by ARP-WASP Complex	1.19	-2.23607	0.0746	ARPC1B,ITGA4,RHOG,RHOU,RRAS2
Growth Hormone Signaling	1.19	1	0.0746	FOS,IGFBP3,PIK3C2B,SLC2A4,STAT1
IL-12 Signaling and Production in Macrophages	1.18		0.0631	FOS,IL23A,PIK3C2B,PPARG,RBP4,STAT1,STAT4
Axonal Guidance Signaling	1.18		0.0459	ADAMTS14,ADAMTS4,ARPC1B,FZD10,FZD2,FZD7,ITGA4,MAG,MMP14,MMP15,MYL4,NTF3,PIK3C2B,PLXNB3,RRAS2,UNC5B,UNC5D,WNT10B,WNT2,WNT7A,WNT7B
Bladder Cancer Signaling	1.14		0.0659	FGF7,MMP14,MMP15,MYC,RRAS2,THBS1
Activation of IRF by Cytosolic Pattern Recognition Receptors	1.14	1	0.0816	DDX58,IRF7,ISG15,STAT1
Caveolar-mediated Endocytosis Signaling	1.13		0.0714	FLNC,ITGA4,ITGAD,ITGB3,ITGB7
Glioma Invasiveness Signaling	1.11	-2.23607	0.0704	ITGB3,PIK3C2B,RHOG,RHOU,RRAS2
Leukocyte Extravasation Signaling	1.11	-1.13389	0.0538	CLDN11,CLDN14,CTNNA3,CYBB,ICAM1,ITGA4,ITGB3,MMP14,MMP15,PIK3C2B
Regulation of the Epithelial-Mesenchymal Transition Pathway	1.09		0.0532	FGF7,FZD10,FZD2,FZD7,PIK3C2B,RRAS2,WNT10B,WNT2,WNT7A,WNT7B
cAMP-mediated signaling	1.07	-3.31662	0.0514	ADRA2B,APLNR,CRHR1,DRD5,DUSP1,ENPP6,GRM3,GRM4,LPAR1,OPRK1,PDE8A
Fatty Acid Œ±-oxidation	1.04		0.125	ALDH1A3,ALOX12B
Agrin Interactions at Neuromuscular Junction	1.03	-1.34164	0.0667	ERBB3,ITGA4,ITGB3,MUSK,RRAS2
Macropinocytosis Signaling	1.03		0.0667	ITGB3,ITGB7,MRC1,PIK3C2B,RRAS2
Thiosulfate Disproportionation III (Rhodanese)	1.03		0.333	TST
Thyroid Hormone Biosynthesis	1.03		0.333	IYD
GŒ±i Signaling	1.01	-2.64575	0.0574	ADRA2B,APLNR,GRM3,GRM4,LPAR1,OPRK1,RRAS2
Thyroid Cancer Signaling	1.01	-0.447214	0.0658	FOS,MYC,NTF3,PIK3C2B,RRAS2
Production of Nitric Oxide and Reactive Oxygen Species in Macrophages	0.998	0.333333	0.0526	CYBB,FOS,PIK3C2B,PPP1R14A,PPP1R3C,RBP4,RHOG,RHOU,STAT1
Inhibition of Matrix Metalloproteases	0.994		0.0857	MMP14,MMP15,SDC1
Mouse Embryonic Stem Cell Pluripotency	0.988	-1.63299	0.06	FZD10,FZD2,FZD7,MYC,PIK3C2B,RRAS2
Adipogenesis pathway	0.966		0.056	EGR2,FZD10,FZD2,FZD7,PPARG,SLC2A4,WNT10B
Prolactin Signaling	0.958	0.447214	0.0633	FOS,MYC,PIK3C2B,RRAS2,STAT1
CDK5 Signaling	0.957	0	0.0588	DRD5,FOSB,MAPK15,PPP1R14A,PPP1R3C,RRAS2
JAK/Stat Signaling	0.941	0.447214	0.0625	FOS,PIK3C2B,RRAS2,STAT1,STAT4
HER-2 Signaling in Breast Cancer	0.924		0.0617	ERBB3,ITGB3,ITGB7,PIK3C2B,RRAS2
NF-Œ∫B Activation by Viruses	0.924	-1.34164	0.0617	EIF2AK2,ITGA4,ITGB3,PIK3C2B,RRAS2
Paxillin Signaling	0.913		0.0571	ITGA4,ITGAD,ITGB3,ITGB7,PIK3C2B,RRAS2
Role of PKR in Interferon Induction and Antiviral Response	0.913	2.23607	0.0571	DDX58,EIF2AK2,FCGR1A,FOS,SCARA3,STAT1
Melatonin Degradation I	0.913		0.0789	CYP4F8,CYP51A1,Sult1a1
Phenylalanine Degradation I (Aerobic)	0.912		0.25	QDPR
Rapoport-Luebering Glycolytic Shunt	0.912		0.25	BPGM
Apelin Muscle Signaling Pathway	0.91		0.105	APLNR,SLC2A4
Phospholipase C Signaling	0.909	-0.904534	0.0478	FCGR2B,ITGA4,MYL4,PLA2G3,PLA2G4A,PLA2G4E,PLA2G5,PPP1R14A,RHOG,RHOU,RRAS2
Bupropion Degradation	0.873		0.1	CYP4F8,CYP51A1
Regulation of Actin-based Motility by Rho	0.86	-2.23607	0.0588	ARPC1B,ITGA4,MYL4,RHOG,RHOU
Cardiac Hypertrophy Signaling (Enhanced)	0.849	-2.82843	0.042	ACVR1C,ADRA1A,ADRA2B,CYBB,ENPP6,FGF7,FZD10,FZD2,FZD7,IL33,ITGA4,MYC,PDE8A,PIK3C2B,RRAS2,WNT10B,WNT2,WNT7A,WNT7B
ErbB2-ErbB3 Signaling	0.842	-1	0.0635	ERBB3,MYC,PIK3C2B,RRAS2
IL-10 Signaling	0.842		0.0635	FCGR2B,FOS,IL1RAP,IL33
Retinoic acid Mediated Apoptosis Signaling	0.841		0.0732	PARP12,PARP14,PARP9
Dopamine Degradation	0.838		0.0952	ALDH1A3,Sult1a1
Ceramide Degradation	0.822		0.2	ACER2
Protein Citrullination	0.822		0.2	PADI2
Serine Biosynthesis	0.822		0.2	PHGDH
Tetrahydrofolate Salvage from 5,10-methenyltetrahydrofolate	0.822		0.2	MTHFD2
Tetrapyrrole Biosynthesis II	0.822		0.2	ALAS2
Fc Epsilon RI Signaling	0.819	0	0.0536	PIK3C2B,PLA2G3,PLA2G4A,PLA2G4E,PLA2G5,RRAS2
Necroptosis Signaling Pathway	0.817	1.88982	0.0511	CYBB,EIF2AK2,PLA2G3,PLA2G4A,PLA2G4E,PLA2G5,STAT1
Polyamine Regulation in Colon Cancer	0.806		0.0909	MYC,PPARG
Tumoricidal Function of Hepatic Natural Killer Cells	0.806		0.0909	ICAM1,LYVE1
Molecular Mechanisms of Cancer	0.802		0.0424	BRCA1,CDK18,FOS,FZD10,FZD2,FZD7,ITGA4,MYC,PIK3C2B,RHOG,RHOU,RRAS2,WNT10B,WNT2,WNT7A,WNT7B
Superpathway of Melatonin Degradation	0.797		0.0698	CYP4F8,CYP51A1,Sult1a1
ErbB Signaling	0.773	-1.34164	0.0549	ERBB3,FOS,PIK3C2B,RRAS2,TGFA
Neuregulin Signaling	0.759	-1	0.0543	ERBB3,ITGA4,MYC,RRAS2,TGFA
CCR3 Signaling in Eosinophils	0.757	0	0.0513	PIK3C2B,PLA2G3,PLA2G4A,PLA2G4E,PLA2G5,RRAS2
SPINK1 Pancreatic Cancer Pathway	0.756		0.0667	CELA1,CPM,KLK6
Pentose Phosphate Pathway (Non-oxidative Branch)	0.75		0.167	TALDO1
Tryptophan Degradation to 2-amino-3-carboxymuconate Semialdehyde	0.75		0.167	TDO2
Cdc42 Signaling	0.746	-1.34164	0.0508	ARPC1B,CDC42EP2,FOS,H2-T10,ITGA4,MYL4
Acetone Degradation I (to Methylglyoxal)	0.746		0.0833	CYP4F8,CYP51A1
IL-6 Signaling	0.734	-1.63299	0.0504	FOS,IL1RAP,IL33,PIK3C2B,RRAS2,TNFAIP6
HMGB1 Signaling	0.73	-0.816497	0.0483	FOS,ICAM1,IL33,PIK3C2B,RHOG,RHOU,RRAS2
Dopamine Receptor Signaling	0.727		0.0571	DRD5,PPP1R14A,PPP1R3C,QDPR
PPAR Signaling	0.708	0.447214	0.0521	FOS,IL1RAP,IL33,PPARG,RRAS2
Renal Cell Carcinoma Signaling	0.697		0.0556	FOS,PIK3C2B,RRAS2,TGFA
Sphingosine and Sphingosine-1-phosphate Metabolism	0.69		0.143	ACER2
Sucrose Degradation V (Mammalian)	0.69		0.143	SI
Superpathway of Serine and Glycine Biosynthesis I	0.69		0.143	PHGDH
Integrin Signaling	0.684	-2.33333	0.0443	ARPC1B,ITGA4,ITGAD,ITGB3,ITGB7,PIK3C2B,RHOG,RHOU,RRAS2
Sperm Motility	0.684	-0.377964	0.0443	ABHD3,ERBB3,LCAT,MUSK,NPPC,PLA2G3,PLA2G4A,PLA2G4E,PLA2G5
P2Y Purigenic Receptor Signaling Pathway	0.679	-0.447214	0.0484	FOS,ITGB3,MYC,P2RY1,PIK3C2B,RRAS2
IGF-1 Signaling	0.671		0.0505	FOS,IGFBP3,IGFBP4,PIK3C2B,RRAS2
Tec Kinase Signaling	0.662	-0.377964	0.0461	FOS,ITGA4,PIK3C2B,RHOG,RHOU,STAT1,STAT4
Neurotrophin/TRK Signaling	0.656	-1	0.0533	FOS,NTF3,PIK3C2B,RRAS2
Histidine Degradation III	0.638		0.125	MTHFD2
Role of Lipids/Lipid Rafts in the Pathogenesis of Influenza	0.638		0.125	FDPS
Superoxide Radicals Degradation	0.638		0.125	NQO1
Role of Cytokines in Mediating Communication between Immune Cells	0.622		0.069	IL23A,IL33
IL-3 Signaling	0.617	0	0.0513	FOS,PIK3C2B,RRAS2,STAT1
FLT3 Signaling in Hematopoietic Progenitor Cells	0.604	0	0.0506	PIK3C2B,RRAS2,STAT1,STAT4
Role of RIG1-like Receptors in Antiviral Innate Immunity	0.601		0.0667	DDX58,IRF7
Folate Transformations I	0.594		0.111	MTHFD2
Heme Biosynthesis II	0.594		0.111	ALAS2
Ketolysis	0.594		0.111	BDH2
EGF Signaling	0.586		0.0545	FOS,PIK3C2B,STAT1
IL-8 Signaling	0.58	-0.707107	0.0423	CYBB,FOS,ICAM1,ITGB3,PIK3C2B,RHOG,RHOU,RRAS2
Inhibition of Angiogenesis by TSP1	0.58		0.0645	SDC1,THBS1
HGF Signaling	0.574	-1	0.0463	ELF4,FOS,ITGA4,PIK3C2B,RRAS2
Sphingosine-1-phosphate Signaling	0.574	-2	0.0463	ACER2,PIK3C2B,RHOG,RHOU,S1PR5
PI3K Signaling in B Lymphocytes	0.573	0.447214	0.0444	C3,FCGR2B,FOS,PIK3AP1,PLEKHA4,RRAS2
T Cell Exhaustion Signaling Pathway	0.573	1	0.0444	ACVR1C,FOS,PIK3C2B,RRAS2,STAT1,STAT4
CNTF Signaling	0.572		0.0536	PIK3C2B,RRAS2,STAT1
LPS/IL-1 Mediated Inhibition of RXR Function	0.565		0.0419	ALDH1A3,ALDH1L2,CHST3,FABP5,FABP7,HMGCS1,IL1RAP,IL33
IL-9 Signaling	0.561		0.0625	PIK3C2B,STAT1
Bile Acid Biosynthesis, Neutral Pathway	0.555		0.1	CYP27A1
NAD biosynthesis II (from tryptophan)	0.555		0.1	TDO2
Pentose Phosphate Pathway	0.555		0.1	TALDO1
Cholecystokinin/Gastrin-mediated Signaling	0.554	-1.34164	0.0455	FOS,IL33,RHOG,RHOU,RRAS2
Rac Signaling	0.554	-1.34164	0.0455	ARPC1B,CYBB,ITGA4,PIK3C2B,RRAS2
Ceramide Signaling	0.546	0	0.0476	FOS,PIK3C2B,RRAS2,S1PR5
Th17 Activation Pathway	0.544		0.0517	IL23A,RORC,STAT4
D-myo-inositol-5-phosphate Metabolism	0.539	0	0.0432	ALPL,DUSP1,PAWR,PIP4K2A,PPP1R14A,PTPRH
Apelin Endothelial Signaling Pathway	0.526	-0.447214	0.0442	APLNR,FOS,ICAM1,PIK3C2B,RRAS2
Th2 Pathway	0.526		0.0442	ACVR1C,ICAM1,IL33,PIK3C2B,STAT4
Estrogen Biosynthesis	0.525		0.0588	CYP4F8,CYP51A1
Androgen Biosynthesis	0.52		0.0909	SRD5A1
Endometrial Cancer Signaling	0.518		0.05	MYC,PIK3C2B,RRAS2
IL-2 Signaling	0.518		0.05	FOS,PIK3C2B,RRAS2
Mitotic Roles of Polo-Like Kinase	0.518		0.05	KIF11,PRC1,STAG2
T Helper Cell Differentiation	0.518		0.05	RORC,STAT1,STAT4
Wnt/Ca+ pathway	0.505		0.0492	FZD10,FZD2,FZD7
Systemic Lupus Erythematosus In T Cell Signaling Pathway	0.502	-0.707107	0.04	FOS,H2-T10,IL23A,PIK3C2B,RHOG,RHOU,RORC,RRAS2
Th1 and Th2 Activation Pathway	0.498		0.0417	ACVR1C,ICAM1,IL33,PIK3C2B,STAT1,STAT4
CD40 Signaling	0.493		0.0484	FOS,ICAM1,PIK3C2B
RhoA Signaling	0.49	-2	0.0427	ANLN,ARPC1B,CDC42EP2,LPAR1,MYL4
Leukotriene Biosynthesis	0.489		0.0833	ALOX5
Salvage Pathways of Pyrimidine Ribonucleotides	0.484	1	0.0444	APOBEC1,CDK18,EIF2AK2,NEK2
TGF-Œ≤ Signaling	0.474	-1	0.044	ACVR1C,FOS,IRF7,RRAS2
Pyridoxal 5-phosphate Salvage Pathway	0.47		0.0469	CDK18,EIF2AK2,NEK2
Opioid Signaling Pathway	0.464	1.13389	0.0383	AP1G2,EGR4,FOS,FOSB,MAPK15,MYC,OPRK1,RGS5,RRAS2
PAK Signaling	0.456	-2	0.043	ITGA4,MYL4,PIK3C2B,RRAS2
3-phosphoinositide Biosynthesis	0.454	0	0.04	ALPL,DUSP1,PAWR,PIK3C2B,PPP1R14A,PTPRH
Role of JAK1 and JAK3 in Œ≥c Cytokine Signaling	0.448		0.0455	PIK3C2B,RRAS2,STAT1
Superpathway of Inositol Phosphate Compounds	0.446	-0.377964	0.0389	ALPL,DUSP1,PAWR,PIK3C2B,PIP4K2A,PPP1R14A,PTPRH
14-3-3-mediated Signaling	0.442	0	0.0407	FOS,GFAP,PIK3C2B,RRAS2,VIM
TREM1 Signaling	0.437		0.0448	FCGR2B,ICAM1,NLRC5
Toll-like Receptor Signaling	0.437		0.0448	EIF2AK2,FOS,IL33
DNA Double-Strand Break Repair by Homologous Recombination	0.435		0.0714	BRCA1
Histamine Degradation	0.435		0.0714	ALDH1A3
Nicotine Degradation III	0.432		0.05	CYP4F8,CYP51A1
Apelin Cardiomyocyte Signaling Pathway	0.429	-1	0.0417	APLNR,MAPK15,MYL4,PIK3C2B
Synaptic Long Term Potentiation	0.427	-0.447214	0.04	GRM3,GRM4,PPP1R14A,PPP1R3C,RRAS2
Sumoylation Pathway	0.421		0.0412	FOS,ISG20,RHOG,RHOU
BAG2 Signaling Pathway	0.419		0.0488	ANXA2,MYC
Oncostatin M Signaling	0.419		0.0488	RRAS2,STAT1
tRNA Splicing	0.419		0.0488	ENPP6,PDE8A
D-myo-inositol (1,4,5,6)-Tetrakisphosphate Biosynthesis	0.419	0.447214	0.0397	ALPL,DUSP1,PAWR,PPP1R14A,PTPRH
D-myo-inositol (3,4,5,6)-tetrakisphosphate Biosynthesis	0.419	0.447214	0.0397	ALPL,DUSP1,PAWR,PPP1R14A,PTPRH
GM-CSF Signaling	0.417		0.0435	PIK3C2B,RRAS2,STAT1
IL-7 Signaling Pathway	0.417		0.0435	MYC,PIK3C2B,STAT1
Neuropathic Pain Signaling In Dorsal Horn Neurons	0.413	-1	0.0408	FOS,GRM3,GRM4,PIK3C2B
Histidine Degradation VI	0.412		0.0667	CYP11A1
GŒ±12/13 Signaling	0.412	-1.34164	0.0394	CDH15,LPAR1,MYL4,PIK3C2B,RRAS2
Adrenomedullin signaling pathway	0.409	-1.13389	0.0376	C3,FOS,IL33,MAPK15,PIK3C2B,PPARG,RRAS2
Apelin Pancreas Signaling Pathway	0.406		0.0476	APLNR,PIK3C2B
Serotonin Degradation	0.406		0.0476	ALDH1A3,Sult1a1
Telomerase Signaling	0.404	0	0.0404	ELF4,MYC,PIK3C2B,RRAS2
Systemic Lupus Erythematosus Signaling	0.4		0.038	FCGR1A,FCGR2B,FOS,IL33,PIK3C2B,RRAS2
ERK5 Signaling	0.398		0.0423	FOS,MYC,RRAS2
Th1 Pathway	0.397		0.04	ICAM1,PIK3C2B,STAT1,STAT4
Extrinsic Prothrombin Activation Pathway	0.39		0.0625	THBD
Lipid Antigen Presentation by CD1	0.39		0.0625	AP1G2
Xenobiotic Metabolism PXR Signaling Pathway	0.388	-2.44949	0.0375	ALDH1A3,ALDH1L2,CHST3,PPP1R14A,PPP1R3C,UGT8
Estrogen-Dependent Breast Cancer Signaling	0.388		0.0417	FOS,PIK3C2B,RRAS2
iNOS Signaling	0.382		0.0455	FOS,STAT1
T Cell Receptor Signaling	0.381		0.0392	FOS,PIK3C2B,PTPRH,RRAS2
IL-15 Signaling	0.379		0.0411	MYC,PIK3C2B,RRAS2
Non-Small Cell Lung Cancer Signaling	0.379		0.0411	PIK3C2B,RRAS2,TGFA
CXCR4 Signaling	0.376	-2.23607	0.037	FOS,MYL4,PIK3C2B,RHOG,RHOU,RRAS2
Aryl Hydrocarbon Receptor Signaling	0.371		0.0376	ALDH1A3,ALDH1L2,FOS,MYC,NQO1
Ubiquinol-10 Biosynthesis (Eukaryotic)	0.37		0.0588	CYP11A1
Apelin Adipocyte Signaling Pathway	0.362		0.04	APLNR,CYBB,MAPK15
FcŒ≥RIIB Signaling in B Lymphocytes	0.362		0.04	FCGR2B,PIK3C2B,RRAS2
GDNF Family Ligand-Receptor Interactions	0.362		0.04	FOS,PIK3C2B,RRAS2
Stearate Biosynthesis I (Animals)	0.359		0.0435	BDH2,ELOVL1
Insulin Receptor Signaling	0.358	-2	0.037	PIK3C2B,PPP1R14A,PPP1R3C,RRAS2,SLC2A4
Erythropoietin Signaling	0.353		0.0395	FOS,PIK3C2B,RRAS2
Putrescine Degradation III	0.352		0.0556	ALDH1A3
3-phosphoinositide Degradation	0.34	0.447214	0.0362	ALPL,DUSP1,PAWR,PPP1R14A,PTPRH
Nicotine Degradation II	0.338		0.0417	CYP4F8,CYP51A1
DNA damage-induced 14-3-3œÉ Signaling	0.335		0.0526	BRCA1
GADD45 Signaling	0.335		0.0526	BRCA1
Inflammasome pathway	0.335		0.0526	AIM2
Cell Cycle: G2/M DNA Damage Checkpoint Regulation	0.328		0.0408	BRCA1,TOP2A
UVB-Induced MAPK Signaling	0.328		0.0408	FOS,PIK3C2B
LPS-stimulated MAPK Signaling	0.322		0.0375	FOS,PIK3C2B,RRAS2
TR/RXR Activation	0.322		0.0375	LDLR,PIK3C2B,RAB3B
Synaptogenesis Signaling Pathway	0.318	-1.89737	0.0338	AP1G2,ARPC1B,CDH15,GRM3,GRM4,PIK3C2B,RRAS2,SYT10,THBS1,THBS4
Melanoma Signaling	0.318		0.04	PIK3C2B,RRAS2
RhoGDI Signaling	0.316	2.44949	0.0347	ARPC1B,CDH15,ITGA4,MYL4,RHOG,RHOU
PEDF Signaling	0.314		0.037	PIK3C2B,PPARG,RRAS2
UVC-Induced MAPK Signaling	0.309		0.0392	FOS,RRAS2
fMLP Signaling in Neutrophils	0.306	-1	0.0354	ARPC1B,CYBB,PIK3C2B,RRAS2
Role of JAK1, JAK2 and TYK2 in Interferon Signaling	0.304		0.0476	STAT1
Thyroid Hormone Metabolism II (via Conjugation and/or Degradation)	0.304		0.0476	Sult1a1
Tryptophan Degradation X (Mammalian, via Tryptamine)	0.304		0.0476	ALDH1A3
Vitamin-C Transport	0.304		0.0476	SLC2A4
Endocannabinoid Developing Neuron Pathway	0.3	-1	0.0351	BRCA1,MAPK15,PIK3C2B,RRAS2
Cell Cycle Control of Chromosomal Replication	0.291		0.0377	CDK18,TOP2A
SPINK1 General Cancer Pathway	0.291		0.0377	PIK3C2B,RRAS2
Apelin Cardiac Fibroblast Signaling Pathway	0.29		0.0455	APLNR
IL-17A Signaling in Gastric Cells	0.29		0.0455	FOS
Role of Hypercytokinemia/hyperchemokinemia in the Pathogenesis of Influenza	0.29		0.0455	IL33
Renin-Angiotensin Signaling	0.289		0.0345	FOS,PIK3C2B,RRAS2,STAT1
MSP-RON Signaling Pathway	0.283		0.037	KLK6,PIK3C2B
Glycolysis I	0.277		0.0435	BPGM
Tryptophan Degradation III (Eukaryotic)	0.277		0.0435	TDO2
Glutamate Receptor Signaling	0.274		0.0364	GRM3,GRM4
Unfolded protein response	0.274		0.0364	CD82,PPARG
PXR/RXR Activation	0.267		0.0357	Aldh1a7,SCD
Semaphorin Signaling in Neurons	0.267		0.0357	RHOG,RHOU
Acute Myeloid Leukemia Signaling	0.267		0.0341	MYC,PIK3C2B,RRAS2
Death Receptor Signaling	0.267		0.0341	PARP12,PARP14,PARP9
Gluconeogenesis I	0.265		0.0417	BPGM
IL-22 Signaling	0.265		0.0417	STAT1
Prostate Cancer Signaling	0.261		0.0337	PIK3C2B,RRAS2,SRD5A1
p53 Signaling	0.255		0.0333	BRCA1,PIK3C2B,THBS1
D-myo-inositol (1,4,5)-Trisphosphate Biosynthesis	0.253		0.04	PIP4K2A
Role of JAK family kinases in IL-6-type Cytokine Signaling	0.253		0.04	STAT1
Reelin Signaling in Neurons	0.246	-2	0.0323	ARPC1B,ITGA4,ITGB3,PIK3C2B
Communication between Innate and Adaptive Immune Cells	0.244		0.0339	Ccl9,IL33
Estrogen-mediated S-phase Entry	0.242		0.0385	MYC
Antigen Presentation Pathway	0.232		0.037	NLRC5
Noradrenaline and Adrenaline Degradation	0.232		0.037	ALDH1A3
Role of p14/p19ARF in Tumor Suppression	0.232		0.037	PIK3C2B
Retinoate Biosynthesis I	0.222		0.0357	ALDH1A3
Triacylglycerol Biosynthesis	0.222		0.0357	ELOVL1
Graft-versus-Host Disease Signaling	0.213		0.0345	IL33
TNFR2 Signaling	0.204		0.0333	FOS
IL-17A Signaling in Fibroblasts	0.196		0.0323	FOS
Role of JAK2 in Hormone-like Cytokine Signaling	0.196		0.0323	STAT1
AMPK Signaling	0	-1	0.0293	ADRA1A,ADRA2B,CHRNA3,CHRNB4,PIK3C2B,SLC2A4
ATM Signaling	0		0.011	BRCA1
Actin Cytoskeleton Signaling	0	-2.23607	0.0294	ARPC1B,FGF7,ITGA4,MYL4,PIK3C2B,RRAS2
Aldosterone Signaling in Epithelial Cells	0		0.02	CRYAB,DUSP1,PIK3C2B
Allograft Rejection Signaling	0		0.027	H2-T10
Altered T Cell and B Cell Signaling in Rheumatoid Arthritis	0		0.0274	IL23A,IL33
Amyloid Processing	0		0.0204	BACE2
Amyotrophic Lateral Sclerosis Signaling	0		0.0106	PIK3C2B
Angiopoietin Signaling	0		0.0274	PIK3C2B,RRAS2
Antiproliferative Role of Somatostatin Receptor 2	0		0.0267	PIK3C2B,RRAS2
Apoptosis Signaling	0		0.0103	RRAS2
April Mediated Signaling	0		0.0256	FOS
Autophagy	0		0.0196	CTSC
B Cell Activating Factor Signaling	0		0.025	FOS
B Cell Receptor Signaling	0		0.0237	FCGR2B,PIK3AP1,PIK3C2B,RRAS2
BMP signaling pathway	0		0.0128	RRAS2
CCR5 Signaling in Macrophages	0		0.0116	FOS
CD27 Signaling in Lymphocytes	0		0.0196	FOS
CD28 Signaling in T Helper Cells	0		0.0283	ARPC1B,FOS,PIK3C2B
CREB Signaling in Neurons	0	-2	0.0197	GRM3,GRM4,PIK3C2B,RRAS2
CTLA4 Signaling in Cytotoxic T Lymphocytes	0		0.0263	AP1G2,PIK3C2B
Calcium Signaling	0		0.0205	CHRNA3,CHRNB4,MYL4,TRPC6
Calcium-induced T Lymphocyte Apoptosis	0		0.0189	NR4A1
Cancer Drug Resistance By Drug Efflux	0		0.0179	RRAS2
Cardiac Hypertrophy Signaling	0	-2.64575	0.0308	ADRA1A,ADRA2B,MYL4,PIK3C2B,RHOG,RHOU,RRAS2
Cardiac Œ≤-adrenergic Signaling	0	0	0.0315	ENPP6,PDE8A,PPP1R14A,PPP1R3C
Cell Cycle Regulation by BTG Family Proteins	0		0.0303	BTG2
Cell Cycle: G1/S Checkpoint Regulation	0		0.0156	MYC
Cellular Effects of Sildenafil (Viagra)	0		0.00826	MYL4
Chemokine Signaling	0		0.0267	FOS,RRAS2
Chondroitin Sulfate Biosynthesis	0		0.0213	CHST3
Chondroitin Sulfate Biosynthesis (Late Stages)	0		0.0256	CHST3
Chronic Myeloid Leukemia Signaling	0		0.0294	MYC,PIK3C2B,RRAS2
Coagulation System	0		0.0294	THBD
Corticotropin Releasing Hormone Signaling	0		0.0216	CRHR1,FOS,NR4A1
Dermatan Sulfate Biosynthesis	0		0.02	CHST3
Dermatan Sulfate Biosynthesis (Late Stages)	0		0.027	CHST3
Docosahexaenoic Acid (DHA) Signaling	0		0.027	PIK3C2B
Dopamine-DARPP32 Feedback in cAMP Signaling	0		0.0261	DRD5,PAWR,PPP1R14A,PPP1R3C
EIF2 Signaling	0	-1.34164	0.026	EIF2AK2,MYC,NKX6-2,PIK3C2B,RRAS2
Endocannabinoid Cancer Inhibition Pathway	0		0.0221	MYC,PIK3C2B,VIM
Endocannabinoid Neuronal Synapse Pathway	0		0.00794	MAPK15
Ephrin A Signaling	0		0.0217	PIK3C2B
Ephrin Receptor Signaling	0		0.017	ARPC1B,ITGA4,RRAS2
Epithelial Adherens Junction Signaling	0		0.0286	ACVR1C,ARPC1B,MYL4,RRAS2
ErbB4 Signaling	0		0.0303	PIK3C2B,RRAS2
Estrogen Receptor Signaling	0	-0.377964	0.0227	FOS,MMP14,MMP15,MYC,MYL4,PIK3C2B,RRAS2
FAK Signaling	0		0.0319	ITGA4,PIK3C2B,RRAS2
FAT10 Cancer Signaling Pathway	0		0.0222	ACVR1C
FGF Signaling	0		0.0238	FGF7,PIK3C2B
FcŒ≥ Receptor-mediated Phagocytosis in Macrophages and Monocytes	0		0.0217	ARPC1B,FCGR1A
G Beta Gamma Signaling	0		0.00833	RRAS2
GABA Receptor Signaling	0		0.0114	AP1G2
GNRH Signaling	0		0.012	FOS,RRAS2
GPCR-Mediated Nutrient Sensing in Enteroendocrine Cells	0		0.00935	CASR
Gap Junction Signaling	0		0.0266	GJB1,GJC2,LPAR1,PIK3C2B,RRAS2
Germ Cell-Sertoli Cell Junction Signaling	0		0.0316	PIK3C2B,PLS1,RHOG,RHOU,RRAS2
Glioma Signaling	0		0.0275	PIK3C2B,RRAS2,TGFA
Glucocorticoid Receptor Signaling	0		0.0301	ANXA1,CD163,DUSP1,FCGR1A,FOS,ICAM1,PIK3C2B,RRAS2,STAT1
Gustation Pathway	0		0.0242	ENPP6,P2RY1,PDE8A
GŒ±q Signaling	0	-2	0.0263	ADRA1A,PIK3C2B,RHOG,RHOU
GŒ±s Signaling	0		0.0194	CRHR1,DRD5
HIPPO signaling	0		0.025	PPP1R14A,PPP1R3C
Heparan Sulfate Biosynthesis	0		0.0159	CHST3
Heparan Sulfate Biosynthesis (Late Stages)	0		0.0179	CHST3
Hepatic Cholestasis	0		0.0245	ATP8B1,CYP27A1,IL1RAP,IL33
Hereditary Breast Cancer Signaling	0		0.0227	BRCA1,PIK3C2B,RRAS2
Huntingtons Disease Signaling	0		0.00905	PIK3C2B,SH3GL3
Hypoxia Signaling in the Cardiovascular System	0		0.0278	NQO1,SLC2A4
IL-1 Signaling	0		0.0225	FOS,IL1RAP
IL-15 Production	0		0.0263	ERBB3,MUSK,STAT1
IL-17 Signaling	0		0.027	PIK3C2B,RRAS2
IL-17A Signaling in Airway Cells	0		0.0164	PIK3C2B
IL-4 Signaling	0		0.0253	PIK3C2B,RRAS2
Inhibition of ARE-Mediated mRNA Degradation Pathway	0		0.00893	MAPK15
Leptin Signaling in Obesity	0		0.0141	PIK3C2B
Lymphotoxin Œ≤ Receptor Signaling	0		0.0196	PIK3C2B
Mechanisms of Viral Exit from Host Cells	0		0.0256	SH3GL3
Melanocyte Development and Pigmentation Signaling	0		0.0215	PIK3C2B,RRAS2
Melatonin Signaling	0		0.0294	RORC,SLC2A4
Mitochondrial Dysfunction	0		0.0142	BACE2,COX6B2
Myc Mediated Apoptosis Signaling	0		0.0208	MYC
NER Pathway	0		0.0114	TOP2A
NF-Œ∫B Signaling	0	-1.34164	0.0307	EIF2AK2,IL33,PIK3C2B,RRAS2,TGFA
NGF Signaling	0		0.0268	PIK3C2B,RHOG,RRAS2
NRF2-mediated Oxidative Stress Response	0		0.0284	FOS,JUNB,NQO1,PIK3C2B,RRAS2
Natural Killer Cell Signaling	0	-1.34164	0.0303	COL2A1,COL5A3,PIK3C2B,RRAS2,STAT4
Netrin Signaling	0		0.0312	UNC5B,UNC5D
Neuroprotective Role of THOP1 in Alzheimers Disease	0		0.0306	KLK6,PRSS53,SERPINA3
Nitric Oxide Signaling in the Cardiovascular System	0		0.0111	PIK3C2B
Notch Signaling	0		0.0278	MAG
Nur77 Signaling in T Lymphocytes	0		0.0217	NR4A1
OX40 Signaling Pathway	0		0.0204	H2-T10
Oxidative Phosphorylation	0		0.012	COX6B2
PD-1, PD-L1 cancer immunotherapy pathway	0		0.0115	PIK3C2B
PI3K/AKT Signaling	0		0.0118	ITGA4,RRAS2
PKCŒ∏ Signaling in T Lymphocytes	0		0.0211	FOS,PIK3C2B,RRAS2
PPARŒ±/RXRŒ± Activation	0		0.0173	ACVR1C,IL1RAP,RRAS2
PTEN Signaling	0		0.0161	ITGA4,RRAS2
Pancreatic Adenocarcinoma Signaling	0		0.0283	PIK3C2B,STAT1,TGFA
Phagosome Maturation	0		0.0229	CTSC,CYBB,LPO
Protein Kinase A Signaling	0	-0.816497	0.0222	DUSP1,ENPP6,FLNC,MYL4,PDE8A,PPP1R14A,PPP1R3C,PTPRH
Protein Ubiquitination Pathway	0		0.0118	BRCA1,CRYAB,USP18
RANK Signaling in Osteoclasts	0		0.0233	FOS,PIK3C2B
RAR Activation	0		0.0272	ALDH1A3,DUSP1,FOS,IGFBP3,RBP4
Regulation of Cellular Mechanics by Calpain Protease	0		0.0317	ITGA4,RRAS2
Regulation of IL-2 Expression in Activated and Anergic T Lymphocytes	0		0.0235	FOS,RRAS2
Regulation of eIF4 and p70S6K Signaling	0		0.0211	ITGA4,PIK3C2B,RRAS2
Relaxin Signaling	0		0.0278	ENPP6,FOS,PDE8A,PIK3C2B
Remodeling of Epithelial Adherens Junctions	0		0.0156	ARPC1B
Retinol Biosynthesis	0		0.0278	LIPG
Role of BRCA1 in DNA Damage Response	0		0.0263	BRCA1,STAT1
Role of CHK Proteins in Cell Cycle Checkpoint Control	0		0.0185	BRCA1
Role of IL-17A in Arthritis	0		0.02	PIK3C2B
Role of NFAT in Cardiac Hypertrophy	0		0.00971	PIK3C2B,RRAS2
Role of NFAT in Regulation of the Immune Response	0	0.447214	0.0305	FCGR1A,FCGR2B,FOS,PIK3C2B,RRAS2
Role of Oct4 in Mammalian Embryonic Stem Cell Pluripotency	0		0.0233	BRCA1
Role of PI3K/AKT Signaling in the Pathogenesis of Influenza	0		0.0204	PIK3C2B
Role of Tissue Factor in Cancer	0		0.0273	ITGB3,PIK3C2B,RRAS2
SAPK/JNK Signaling	0		0.0215	PIK3C2B,RRAS2
STAT3 Pathway	0		0.0227	MYC,RRAS2,TGFA
Senescence Pathway	0	-0.447214	0.0195	ACVR1C,ELF4,MAPK15,PIK3C2B,RRAS2
Serotonin Receptor Signaling	0		0.0256	QDPR
Sertoli Cell-Sertoli Cell Junction Signaling	0		0.0294	CLDN11,CLDN14,ITGA4,PLS1,RRAS2
Sirtuin Signaling Pathway	0	-1.34164	0.0241	ACSS2,BPGM,MAPK15,MYC,NQO1,PPARG
Small Cell Lung Cancer Signaling	0		0.0282	MYC,PIK3C2B
TNFR1 Signaling	0		0.0208	FOS
Thrombin Signaling	0	-2	0.025	MYL4,PIK3C2B,RHOG,RHOU,RRAS2
Tight Junction Signaling	0		0.0258	CLDN11,CLDN14,FOS,MYL4
Triacylglycerol Degradation	0		0.0256	LIPG
Type I Diabetes Mellitus Signaling	0		0.0208	IL1RAP,STAT1
Type II Diabetes Mellitus Signaling	0		0.0217	PIK3C2B,PPARG,SLC2A4
VEGF Signaling	0		0.0211	PIK3C2B,RRAS2
White Adipose Tissue Browning Pathway	0		0.00826	PPARG
Xenobiotic Metabolism CAR Signaling Pathway	0	-2	0.0258	ALDH1A3,ALDH1L2,CHST3,UGT8
Xenobiotic Metabolism General Signaling Pathway	0	-1	0.0312	NQO1,PIK3C2B,RRAS2,UGT8
Xenobiotic Metabolism Signaling	0		0.0278	ALDH1A3,ALDH1L2,CHST3,NQO1,PIK3C2B,RRAS2,UGT8
eNOS Signaling	0	-2	0.0274	CHRNA3,CHRNB4,LPAR1,PIK3C2B
iCOS-iCOSL Signaling in T Helper Cells	0		0.0204	PIK3C2B,PLEKHA4
mTOR Signaling	0	-2	0.0263	DDIT4,PIK3C2B,RHOG,RHOU,RRAS2
p70S6K Signaling	0		0.016	PIK3C2B,RRAS2
Œ±-Adrenergic Signaling	0		0.0215	ADRA1A,RRAS2
