# Supplementary material for: STAG2 promotes the myelination transcriptional program in oligodendrocytes
Source: eLife. 2022 Aug 12;11:e77848. doi: 10.7554/eLife.77848 (PMC9439679; doi:10.7554/eLife.77848)
Supplement: Supplementary file 2. [file elife-77848-supp2.xlsx]

## Sheet: Sheet1
GENE_NAME	logFC	Pvalue	FDR	diffexpressed	STAG2 at TSS +/-2kb	wt.loop	cko.loop
Klk6	-6.15471	5.17e-32	1.44e-30	2foldDOWN	Yes
Sp7	-5.23114	8.15e-95	9.43e-93	2foldDOWN	NA
Mal	-5.09909	0	0	2foldDOWN	Yes	1	0
Carns1	-3.57364	4.8e-206	2.43e-203	2foldDOWN	NA
Atp8b1	-3.08133	5.19e-97	6.2e-95	2foldDOWN	Yes	1	0
Egfl6	-3.01894	2.62e-23	5.22e-22	2foldDOWN	NA
Slc45a3	-2.99694	2.29e-250	1.69e-247	2foldDOWN	Yes
Tmod1	-2.96035	3.15e-185	1.19e-182	2foldDOWN	Yes	2	0
Fam163a	-2.94132	1.74e-200	7.77e-198	2foldDOWN	Yes
Thbs4	-2.70923	1.78e-31	4.85e-30	2foldDOWN	NA
Aspa	-2.70552	1.21e-114	2.01e-112	2foldDOWN	NA
Piezo2	-2.67878	2.52e-98	3.1e-96	2foldDOWN	Yes	1	1
Cdc42ep2	-2.61862	4.25e-144	1.02e-141	2foldDOWN	Yes	4	2
Gjb1	-2.60406	4.24e-172	1.31e-169	2foldDOWN	NA
Cpm	-2.53797	0	5.21e-306	2foldDOWN	Yes	1	0
Rras2	-2.49846	0	0	2foldDOWN	Yes	4	1
Smtnl2	-2.49518	1.28e-20	2.2e-19	2foldDOWN	Yes	3	0
Fam178b	-2.49021	1.03e-18	1.58e-17	2foldDOWN	Yes
Nkx6-2	-2.44665	1.41e-82	1.26e-80	2foldDOWN	Yes	4	2
Lect1	-2.42673	6.9e-47	2.97e-45	2foldDOWN	NA	1	0
Gm8801	-2.37231	2.51e-11	2.25e-10	2foldDOWN	NA
Hapln2	-2.36602	2.11e-64	1.31e-62	2foldDOWN	Yes
Nipal4	-2.36047	0	0	2foldDOWN	Yes
Onecut2	-2.33379	2.32e-70	1.62e-68	2foldDOWN	Yes	14	6
Gp2	-2.27639	2.35e-22	4.44e-21	2foldDOWN	NA	1	2
Pls1	-2.25984	1.01e-34	3.06e-33	2foldDOWN	Yes	6	3
Galnt3	-2.23325	3.5e-14	3.98e-13	2foldDOWN	Yes	1	0
Tmem178	-2.21022	3.58e-117	6.2e-115	2foldDOWN	Yes	4	0
Sytl5	-2.16758	4.18e-94	4.73e-92	2foldDOWN	NA
Mobp	-2.16099	0	0	2foldDOWN	NA	2	0
Gpr176	-2.15472	7.96e-76	6.24e-74	2foldDOWN	Yes
Gng8	-2.12198	1.17e-16	1.58e-15	2foldDOWN	Yes	6	1
Gsn	-2.11709	0	0	2foldDOWN	Yes
Ninj1	-2.10177	1.59e-233	9.53e-231	2foldDOWN	Yes	6	0
Crtac1	-2.08367	1.08e-109	1.58e-107	2foldDOWN	Yes	7	0
Il33	-2.07936	2.04e-27	4.85e-26	2foldDOWN	NA
Clgn	-2.06112	2.57e-196	1.1e-193	2foldDOWN	Yes	1	0
Synj2	-2.05642	2.19e-137	4.78e-135	2foldDOWN	Yes
Mboat1	-2.01299	1.54e-30	4.07e-29	2foldDOWN	Yes	1	0
Plcg2	-2.00279	3.92e-152	1.02e-149	2foldDOWN	Yes
St6galnac3	-1.99884	3.12e-99	3.92e-97	2foldDOWN	Yes	2	0
Mc5r	-1.9969	1.42e-16	1.9e-15	2foldDOWN	Yes	2	1
Ninj2	-1.99422	5.75e-37	1.86e-35	2foldDOWN	Yes
Dlk2	-1.96665	1.67e-24	3.5e-23	2foldDOWN	Yes	2	0
Ypel2	-1.9637	1.77e-248	1.26e-245	2foldDOWN	Yes	8	5
Trf	-1.88937	0	0	2foldDOWN	Yes	2	1
Steap1	-1.88094	3.13e-16	4.12e-15	2foldDOWN	Yes	13	7
Epcam	-1.87045	3.55e-83	3.2e-81	2foldDOWN	Yes
Slc24a2	-1.84767	1.03e-124	1.95e-122	2foldDOWN	Yes	1	0
Coro2b	-1.8173	0	0	2foldDOWN	Yes	7	4
Ly6g6f	-1.7931	1.66e-15	2.08e-14	2foldDOWN	NA
S100a14	-1.76747	5.86e-08	3.71e-07	2foldDOWN	Yes	4	2
Dapk2	-1.76194	2.41e-17	3.39e-16	2foldDOWN	Yes
Parm1	-1.7537	8.49e-85	7.77e-83	2foldDOWN	Yes	4	2
Litaf	-1.73243	1.16e-167	3.19e-165	2foldDOWN	Yes
Depdc1b	-1.7277	8.77e-46	3.64e-44	2foldDOWN	Yes	8	3
Il23a	-1.72541	1.32e-53	6.75e-52	2foldDOWN	NA
Elovl1	-1.72385	0	0	2foldDOWN	Yes	2	1
D7Ertd443e	-1.71905	1.06e-09	8.16e-09	2foldDOWN	Yes
Rhcg	-1.71201	3.22e-07	1.86e-06	2foldDOWN	NA	1	1
Man1a	-1.70956	8.86e-206	4.36e-203	2foldDOWN	Yes
Prom1	-1.69587	2.21e-261	2.02e-258	2foldDOWN	Yes
Pdlim2	-1.68172	8.57e-108	1.19e-105	2foldDOWN	NA	3	5
Jph1	-1.67617	1.16e-22	2.23e-21	2foldDOWN	Yes	2	1
Cntn3	-1.66805	9.64e-27	2.23e-25	2foldDOWN	NA
Hspa1b	-1.64745	8.81e-20	1.44e-18	2foldDOWN	Yes	0	1
Gjc2	-1.6446	0	0	2foldDOWN	Yes
Gpr62	-1.6442	6.3e-71	4.48e-69	2foldDOWN	Yes
Tmem141	-1.64088	9.28e-195	3.79e-192	2foldDOWN	Yes
Pla2g4a	-1.63909	4.91e-144	1.17e-141	2foldDOWN	Yes
Unc5b	-1.62805	1.12e-252	8.99e-250	2foldDOWN	Yes	12	6
Kcnk13	-1.61921	1.59e-19	2.54e-18	2foldDOWN	Yes	7	2
Agpat4	-1.61719	0	0	2foldDOWN	Yes	7	1
Neurog2	-1.61364	2.98e-14	3.41e-13	2foldDOWN	Yes	5	1
Plekhh1	-1.60971	4.06e-300	5.2e-297	2foldDOWN	Yes	4	4
Stag2	-1.59772	6.99e-183	2.4e-180	2foldDOWN	Yes	5	3
Ermn	-1.59313	5.64e-210	2.93e-207	2foldDOWN	NA	1	0
Prr18	-1.59017	3.83e-156	1.01e-153	2foldDOWN	Yes	1	0
Prr5l	-1.58561	1.12e-61	6.53e-60	2foldDOWN	Yes
Pld5	-1.58444	7.23e-14	8.04e-13	2foldDOWN	Yes
Tspan15	-1.57871	0	0	2foldDOWN	Yes	1	0
Phlda3	-1.57422	1.71e-106	2.35e-104	2foldDOWN	Yes
Gramd2	-1.56225	8.69e-09	6.02e-08	2foldDOWN	NA
Apod	-1.55884	3.88e-217	2.07e-214	2foldDOWN	Yes
Adssl1	-1.55051	4.2e-58	2.3e-56	2foldDOWN	Yes	5	4
Perm1	-1.54631	5.31e-08	3.38e-07	2foldDOWN	NA
Fnbp1	-1.52848	1.69e-288	1.91e-285	2foldDOWN	Yes	3	0
Ggct	-1.5245	1.36e-32	3.87e-31	2foldDOWN	Yes	4	2
Fam214a	-1.5191	5.9e-174	1.89e-171	2foldDOWN	Yes
Ccdc3	-1.50247	3.56e-17	4.96e-16	2foldDOWN	NA
Fam13c	-1.49904	1.48e-202	6.93e-200	2foldDOWN	Yes	9	0
Fa2h	-1.49567	0	0	2foldDOWN	Yes	0	1
9430076C15Rik	-1.49109	3.83e-05	0.000164218	2foldDOWN	NA	2	0
Omp	-1.48834	4.83e-10	3.83e-09	2foldDOWN	NA	1	0
Gm2721	-1.48397	6.96e-08	4.36e-07	2foldDOWN	NA	1	0
Arhgef28	-1.4793	2.08e-201	9.53e-199	2foldDOWN	Yes	3	3
Tmem117	-1.46285	2.34e-19	3.7e-18	2foldDOWN	Yes
Frmd8	-1.45792	4.66e-242	3.09e-239	2foldDOWN	NA
Gamt	-1.4557	2.54e-105	3.39e-103	2foldDOWN	Yes
Sec14l5	-1.45247	1.84e-64	1.15e-62	2foldDOWN	Yes	4	2
Ptprr	-1.44107	8.42e-51	3.97e-49	2foldDOWN	Yes	2	0
Il12rb1	-1.44099	2.51e-53	1.27e-51	2foldDOWN	NA	2	0
Inf2	-1.43282	1.49e-60	8.4e-59	2foldDOWN	NA	1	0
Tunar	-1.42909	5.15e-46	2.16e-44	2foldDOWN	Yes	4	0
Igsf11	-1.42157	2.42e-169	6.84e-167	2foldDOWN	Yes	8	2
Ttc39c	-1.41673	3.41e-86	3.26e-84	2foldDOWN	Yes
Ppp1r14a	-1.41054	1.93e-26	4.41e-25	2foldDOWN	Yes	0	1
AW011738	-1.40146	1.93e-19	3.08e-18	2foldDOWN	Yes
Jakmip3	-1.39906	1.14e-111	1.7e-109	2foldDOWN	Yes	1	1
Tmtc1	-1.39606	5.51e-127	1.06e-124	2foldDOWN	Yes	3	0
Ldlrap1	-1.37689	1.11e-92	1.21e-90	2foldDOWN	Yes	2	1
Angpt4	-1.37152	2.15e-07	1.27e-06	2foldDOWN	NA
Pla2g16	-1.36727	1.87e-32	5.32e-31	2foldDOWN	Yes
Fam83f	-1.36696	1.88e-05	8.49e-05	2foldDOWN	NA	11	5
Fntb	-1.36617	1.84e-144	4.49e-142	2foldDOWN	Yes	2	0
S100a6	-1.36506	1.44e-135	3.01e-133	2foldDOWN	Yes	6	5
Has2	-1.36265	2.93e-18	4.4e-17	2foldDOWN	Yes
Hspa2	-1.35884	3.52e-77	2.82e-75	2foldDOWN	Yes	3	1
Cers2	-1.35789	6.44992314272683E-310	9.53e-307	2foldDOWN	Yes	1	0
Asap3	-1.35788	6.77e-113	1.06e-110	2foldDOWN	Yes	3	2
Has2os	-1.35785	4.18e-05	0.000177972	2foldDOWN	NA	1	0
5330426P16Rik	-1.35777	1.69e-54	8.78e-53	2foldDOWN	NA	12	8
Cyp27a1	-1.35736	4.48e-51	2.13e-49	2foldDOWN	Yes
Nckap5	-1.35531	6.58e-109	9.36e-107	2foldDOWN	Yes
Npb	-1.34989	3.69e-08	2.38e-07	2foldDOWN	NA
Fam19a4	-1.34811	1e-05	4.71e-05	2foldDOWN	Yes	6	2
Pdgfa	-1.34231	6.63e-80	5.58e-78	2foldDOWN	Yes	10	4
Abhd3	-1.33877	9.18e-130	1.8e-127	2foldDOWN	Yes
D330041H03Rik	-1.33649	2.45e-05	0.000108891	2foldDOWN	NA
Fhdc1	-1.33416	2.81e-14	3.23e-13	2foldDOWN	Yes	4	1
9330182L06Rik	-1.32888	5.95e-123	1.07e-120	2foldDOWN	Yes	2	0
Sytl2	-1.32825	1.01e-171	3.09e-169	2foldDOWN	Yes
Snx33	-1.32731	1.69e-52	8.36e-51	2foldDOWN	Yes	4	1
Tpd52	-1.32718	4.13e-252	3.17e-249	2foldDOWN	Yes	1	0
Tssc4	-1.32588	8.71e-122	1.53e-119	2foldDOWN	Yes	6	2
Mfsd7a	-1.32316	4.46e-11	3.92e-10	2foldDOWN	Yes	1	0
Tmem125	-1.32274	2.65e-184	9.25e-182	2foldDOWN	Yes
Emilin2	-1.32142	7.55e-16	9.66e-15	2foldDOWN	Yes
Micall1	-1.31992	4.18e-268	4.23e-265	2foldDOWN	Yes	1	0
AI506816	-1.30927	8.32e-16	1.06e-14	2foldDOWN	Yes
Lpar1	-1.30295	5.66e-290	6.8e-287	2foldDOWN	Yes	1	1
Slc22a21	-1.30109	4.33e-62	2.55e-60	2foldDOWN	Yes	1	0
Egflam	-1.29824	1.66e-80	1.4e-78	2foldDOWN	Yes	1	0
2210011C24Rik	-1.29374	6.81e-12	6.42e-11	2foldDOWN	NA
I830012O16Rik	-1.27906	0.000203474	0.000772669	2foldDOWN	NA
Cdk18	-1.27706	1.19e-260	1.04e-257	2foldDOWN	Yes
Prss53	-1.27479	3.9e-05	0.000166732	2foldDOWN	NA	1	1
Lamp5	-1.27306	4.8e-09	3.41e-08	2foldDOWN	Yes
Car14	-1.2697	8.19e-59	4.52e-57	2foldDOWN	NA	2	0
Sh3gl3	-1.26908	3.36e-234	2.08e-231	2foldDOWN	Yes	9	4
Lss	-1.26559	9.61e-228	5.43e-225	2foldDOWN	Yes	1	1
Tyro3	-1.26423	1.21e-242	8.32e-240	2foldDOWN	Yes	1	0
Slc13a3	-1.26102	4.47e-39	1.56e-37	2foldDOWN	Yes	2	0
Taldo1	-1.25494	1.87e-269	2e-266	2foldDOWN	Yes	2	1
C630043F03Rik	-1.24949	2.57e-19	4.06e-18	2foldDOWN	NA
Epha1	-1.24817	4.13e-14	4.66e-13	2foldDOWN	Yes
Ebp	-1.24749	7.91e-124	1.46e-121	2foldDOWN	Yes	1	0
Hdhd3	-1.236	8.04e-16	1.03e-14	2foldDOWN	Yes
Ell2	-1.23063	1.5e-109	2.17e-107	2foldDOWN	Yes
Samd11	-1.23016	0.000257296	0.000956816	2foldDOWN	NA
Sema3e	-1.22718	3.24e-38	1.09e-36	2foldDOWN	Yes
Snora61	-1.22333	0.000109305	0.000432606	2foldDOWN	NA
Ldlr	-1.22237	8.58e-145	2.11e-142	2foldDOWN	Yes	2	0
Ndrg1	-1.22022	1.48e-66	9.59e-65	2foldDOWN	Yes	2	0
Il1rap	-1.21072	1.1e-189	4.39e-187	2foldDOWN	Yes	3	0
Gm16938	-1.20903	3.83e-06	1.92e-05	2foldDOWN	Yes
Spns2	-1.2079	5.04e-123	9.23e-121	2foldDOWN	Yes	1	0
Endod1	-1.20405	5.05e-112	7.63e-110	2foldDOWN	Yes	6	1
Rtkn2	-1.2027	5.97e-22	1.11e-20	2foldDOWN	Yes	5	3
Rnf122	-1.20187	2.39e-260	1.99e-257	2foldDOWN	Yes
Arpc1b	-1.19908	1.1e-235	7.07e-233	2foldDOWN	Yes
Gm16861	-1.19871	1e-06	5.43e-06	2foldDOWN	NA
Fam57a	-1.19503	6.5e-59	3.6e-57	2foldDOWN	Yes
Ido2	-1.18993	0.000108431	0.000429322	2foldDOWN	NA
Gsto2	-1.18945	3.32e-09	2.4e-08	2foldDOWN	Yes	3	1
Chst8	-1.18608	1.39e-23	2.79e-22	2foldDOWN	Yes
Bace1	-1.18424	4.31e-265	4.14e-262	2foldDOWN	Yes	1	0
Tmbim1	-1.18363	1.74e-230	1.01e-227	2foldDOWN	Yes	3	3
Dhcr24	-1.1812	1.14e-202	5.46e-200	2foldDOWN	Yes	0	1
Anln	-1.17999	8.62e-52	4.16e-50	2foldDOWN	Yes
Mir5625	-1.17656	0.000134534	0.000525845	2foldDOWN	NA
Csf1	-1.17316	1.87e-94	2.14e-92	2foldDOWN	Yes	12	5
Dgat2	-1.17057	2.05e-94	2.33e-92	2foldDOWN	Yes	2	0
Utp14b	-1.17009	1.8e-93	2.01e-91	2foldDOWN	Yes
Plp1	-1.16953	3.09e-74	2.36e-72	2foldDOWN	NA	5	3
Stxbp6	-1.1688	2.43e-69	1.65e-67	2foldDOWN	Yes	2	0
Rell1	-1.16832	5.3e-75	4.07e-73	2foldDOWN	Yes	1	0
Tbc1d8	-1.16475	3.02e-73	2.24e-71	2foldDOWN	Yes	3	0
Itgb7	-1.16346	1.14e-48	5.14e-47	2foldDOWN	NA	5	3
Gucy1a3	-1.16334	3.61e-98	4.42e-96	2foldDOWN	Yes	6	0
Ctps	-1.15991	1.7e-136	3.66e-134	2foldDOWN	Yes
Ttll7	-1.15911	1.09e-149	2.78e-147	2foldDOWN	Yes	3	0
Sntb1	-1.15497	0.000252895	0.000942275	2foldDOWN	Yes
Slc35f3	-1.15497	1.24e-17	1.78e-16	2foldDOWN	Yes	2	0
Gnb4	-1.15158	7.34e-185	2.71e-182	2foldDOWN	Yes	4	2
Rhou	-1.14786	2.04e-88	2.05e-86	2foldDOWN	Yes	6	3
Olfr279	-1.13766	0.000699353	0.00238341	2foldDOWN	NA
Sema4a	-1.13552	2.9e-140	6.55e-138	2foldDOWN	Yes	4	2
Kcna6	-1.1348	4.75e-68	3.14e-66	2foldDOWN	Yes
Adam19	-1.13449	1.55e-63	9.41e-62	2foldDOWN	Yes	1	0
Secisbp2l	-1.1343	1.47e-171	4.41e-169	2foldDOWN	Yes	1	0
Fads6	-1.13298	8.28e-07	4.54e-06	2foldDOWN	Yes
Adam11	-1.13269	1.17e-108	1.65e-106	2foldDOWN	Yes	1	0
Mag	-1.12599	1.11e-105	1.49e-103	2foldDOWN	Yes
Rassf8	-1.12202	4.57e-39	1.6e-37	2foldDOWN	NA	11	7
Ankrd23	-1.11973	3.91e-32	1.1e-30	2foldDOWN	NA	1	0
Evi2a	-1.11778	3.64e-45	1.49e-43	2foldDOWN	NA
Gm13889	-1.11505	2.02e-21	3.64e-20	2foldDOWN	Yes	7	5
Plekhg3	-1.11494	4.34e-110	6.36e-108	2foldDOWN	Yes	1	0
Cldn11	-1.1149	1.29e-87	1.28e-85	2foldDOWN	Yes	3	5
Hist1h1e	-1.10913	0.000630035	0.00216561	2foldDOWN	Yes
Rinl	-1.10623	3.84e-36	1.22e-34	2foldDOWN	Yes	3	2
Pllp	-1.10479	6.13e-179	2.07e-176	2foldDOWN	Yes	6	1
Derl3	-1.10144	0.00080115	0.00270063	2foldDOWN	NA	2	0
S1pr5	-1.10077	6.12e-90	6.32e-88	2foldDOWN	Yes
Erbb3	-1.10016	1.73e-69	1.18e-67	2foldDOWN	Yes
Gpr37	-1.0953	6.02e-171	1.78e-168	2foldDOWN	Yes	2	0
Myo1d	-1.09114	4.4e-88	4.4e-86	2foldDOWN	Yes
Xrcc3	-1.08914	1.72e-21	3.12e-20	2foldDOWN	Yes
Hn1l	-1.08802	1.04e-77	8.37e-76	2foldDOWN	Yes	3	2
Map7	-1.0821	5.13e-136	1.1e-133	2foldDOWN	Yes	3	1
Bambi-ps1	-1.08199	9.54e-11	8.15e-10	2foldDOWN	Yes
Smco3	-1.07146	3.96e-24	8.14e-23	2foldDOWN	Yes
Nebl	-1.07065	5.39e-21	9.48e-20	2foldDOWN	Yes	3	0
Sox13	-1.06831	3.82e-36	1.22e-34	2foldDOWN	Yes	4	0
Gss	-1.06742	1.18e-76	9.34e-75	2foldDOWN	Yes	1	2
Fdps	-1.06657	1.27e-196	5.56e-194	2foldDOWN	Yes	5	3
Elovl6	-1.06259	3.69e-186	1.42e-183	2foldDOWN	Yes	8	4
Tppp	-1.06048	2.52e-143	5.75e-141	2foldDOWN	Yes
Grhl1	-1.05987	4.8e-23	9.44e-22	2foldDOWN	Yes	1	0
Mvd	-1.0543	1.85e-108	2.6e-106	2foldDOWN	NA
Snx15	-1.05417	7e-100	8.84e-98	2foldDOWN	Yes
Cyp51	-1.05229	1e-184	3.62e-182	2foldDOWN	Yes	3	1
Zdhhc9	-1.05203	1.03e-184	3.66e-182	2foldDOWN	Yes	4	3
Mbp	-1.04428	1.25e-54	6.5e-53	2foldDOWN	Yes	5	1
Larp6	-1.04398	2.77e-27	6.55e-26	2foldDOWN	Yes	0	2
B3galt5	-1.04376	5.84e-40	2.13e-38	2foldDOWN	Yes	3	1
Spock3	-1.04281	1.53e-13	1.65e-12	2foldDOWN	Yes
Ada	-1.04074	0.000109139	0.000432037	2foldDOWN	NA
2022-09-04	-1.03771	6.06e-176	1.97e-173	2foldDOWN	Yes
Dock6	-1.03742	2.6e-172	8.19e-170	2foldDOWN	Yes	1	1
Grin2c	-1.03677	4.1e-20	6.8e-19	2foldDOWN	Yes	2	2
Opalin	-1.03451	1.34e-77	1.08e-75	2foldDOWN	NA	3	2
Fam222a	-1.03352	4.74e-45	1.94e-43	2foldDOWN	Yes	8	1
Cldn14	-1.03206	3.8e-39	1.34e-37	2foldDOWN	NA	1	0
Specc1	-1.02946	6.87e-196	2.87e-193	2foldDOWN	Yes	7	3
Mir7010	-1.02698	7.44e-07	4.09e-06	2foldDOWN	NA	1	0
Snord99	-1.02607	0.00282869	0.00847371	2foldDOWN	NA
Pcsk6	-1.02589	2.79e-55	1.48e-53	2foldDOWN	Yes
Ptpre	-1.02507	7.74e-148	1.96e-145	2foldDOWN	Yes	11	7
Tmc7	-1.02392	3.92e-46	1.65e-44	2foldDOWN	Yes	1	0
Slc1a1	-1.02195	9.37e-170	2.69e-167	2foldDOWN	Yes	7	1
Irx1	-1.02184	0.00282928	0.00847416	2foldDOWN	Yes	11	6
Sspo	-1.01874	3.67e-09	2.65e-08	2foldDOWN	NA
Frmd4b	-1.01844	1.21e-69	8.32e-68	2foldDOWN	Yes
Kcna1	-1.01819	1.86e-86	1.8e-84	2foldDOWN	Yes	5	0
Mog	-1.01748	6.29e-164	1.68e-161	2foldDOWN	NA	1	1
Gm10863	-1.01472	9.22e-11	7.88e-10	2foldDOWN	Yes
Ly6g6d	-1.01469	0.000199762	0.000759475	2foldDOWN	NA
Tecpr2	-1.01349	1.64e-94	1.88e-92	2foldDOWN	Yes
Oxtr	-1.01305	7.91e-05	0.000321151	2foldDOWN	Yes
Cnp	-1.01282	4.53e-78	3.69e-76	2foldDOWN	Yes	3	3
Ippk	-1.012	1.54e-59	8.64e-58	2foldDOWN	Yes	6	3
Pvalb	-1.00599	3.46e-05	0.000149719	2foldDOWN	Yes	1	0
Itpr2	-1.00482	9.48e-140	2.12e-137	2foldDOWN	Yes	3	0
Tcf7l1	-1.00419	9.19e-32	2.53e-30	2foldDOWN	Yes	13	6
Acss2	-1.0041	6.96e-104	9.1e-102	2foldDOWN	Yes	1	2
Adamts4	-1.00331	1.39e-111	2.08e-109	2foldDOWN	Yes	2	3
Acsl3	-1.00281	6.33e-188	2.48e-185	2foldDOWN	NA
Ahrr	-1.0025	3.97e-08	2.55e-07	2foldDOWN	Yes	6	3
Evi2a-evi2b	-1.00053	9.74e-17	1.32e-15	2foldDOWN	NA
Stbd1	1.0001	0.000599672	0.00207185	2foldUP	Yes
Ntng1	1.00216	0.000641772	0.00220241	2foldUP	Yes	2	1
Anxa1	1.00216	1.04e-13	1.14e-12	2foldUP	NA
Map3k19	1.00404	8.14e-09	5.65e-08	2foldUP	NA	2	4
Erdr1	1.00704	2.94e-09	2.15e-08	2foldUP	NA
Rsph1	1.00844	8.07e-14	8.94e-13	2foldUP	Yes
Foxg1	1.01044	8.85e-28	2.12e-26	2foldUP	Yes
Wfikkn2	1.01155	0.000140779	0.00054836	2foldUP	NA
Mia	1.01279	1.82e-10	1.51e-09	2foldUP	NA
Gucy1a2	1.01478	1.24e-23	2.5e-22	2foldUP	Yes	2	2
Crocc	1.01909	8.08e-27	1.88e-25	2foldUP	Yes	5	0
Gpr34	1.01985	3.75e-20	6.23e-19	2foldUP	NA
Dok7	1.02057	1.33e-11	1.22e-10	2foldUP	Yes	1	0
Ccdc96	1.02079	5.56e-09	3.93e-08	2foldUP	NA
Katnal2	1.02122	1.97e-06	1.02e-05	2foldUP	Yes
Unc5d	1.02125	1.78e-11	1.61e-10	2foldUP	Yes	1	0
Nmb	1.02318	3.42e-09	2.47e-08	2foldUP	Yes
Tead1	1.02401	3.66e-57	1.97e-55	2foldUP	Yes	15	2
Tchh	1.02626	1.81e-08	1.21e-07	2foldUP	NA
Pi15	1.0291	0.000169596	0.000651491	2foldUP	NA
Pdgfrl	1.02955	5.4e-09	3.82e-08	2foldUP	Yes
Ptgds	1.03034	6.86e-75	5.25e-73	2foldUP	NA
Otx1	1.03247	6.11e-08	3.86e-07	2foldUP	Yes	4	0
Islr2	1.03489	1.81e-52	8.92e-51	2foldUP	Yes
Ppp1r36	1.0356	8.86e-08	5.47e-07	2foldUP	NA
Emx1	1.03822	1.08e-08	7.35e-08	2foldUP	Yes	1	0
Zbtb42	1.03857	0.000890187	0.00297778	2foldUP	Yes
Bmp6	1.03862	2.47e-12	2.41e-11	2foldUP	Yes
Dnah11	1.04251	7.97e-21	1.39e-19	2foldUP	Yes
4932411E22Rik	1.04849	2.19e-07	1.29e-06	2foldUP	NA	1	0
Prtn3	1.04878	0.000253905	0.000945853	2foldUP	NA	3	3
Aldh1a2	1.05053	3.74e-09	2.69e-08	2foldUP	NA	3	3
Plch1	1.05209	2.24e-13	2.4e-12	2foldUP	Yes	4	1
Gabra5	1.05421	2.88e-26	6.51e-25	2foldUP	Yes	4	2
Lrrc48	1.05465	4.39e-19	6.89e-18	2foldUP	NA
Klhdc7a	1.05501	1.33e-05	6.14e-05	2foldUP	Yes
Ccdc40	1.0589	1.95e-19	3.1e-18	2foldUP	Yes
Dhh	1.05982	1.41e-05	6.48e-05	2foldUP	NA	3	4
Depdc1a	1.06259	0.00168315	0.00530429	2foldUP	Yes	1	0
Kcnn2	1.06482	4.23e-23	8.35e-22	2foldUP	Yes	8	4
Angpt1	1.06697	6.26e-21	1.1e-19	2foldUP	Yes	2	0
Dnaaf3	1.06855	1.02e-07	6.22e-07	2foldUP	NA	1	0
Col4a4	1.07368	0.000403524	0.00144359	2foldUP	Yes
BC064078	1.07621	3.27e-05	0.000141925	2foldUP	NA
Gfap	1.08431	2.26e-225	1.24e-222	2foldUP	NA	7	2
Ttc25	1.08483	3.72e-06	1.87e-05	2foldUP	Yes	0	1
Prelp	1.08681	1.81e-29	4.61e-28	2foldUP	NA	7	4
Gpr22	1.08949	3.76e-05	0.00016123	2foldUP	NA
Spef2	1.09001	4.08e-11	3.6e-10	2foldUP	Yes
Ccdc121	1.09044	7.04e-05	0.000288435	2foldUP	Yes
Gm973	1.09151	9.48e-15	1.13e-13	2foldUP	Yes	1	0
Rgs22	1.09152	8.02e-12	7.52e-11	2foldUP	Yes	9	6
1700088E04Rik	1.09358	1.25e-13	1.36e-12	2foldUP	Yes
Mmp9	1.09574	0.000381118	0.00136905	2foldUP	NA	6	1
Casq1	1.09619	0.000679922	0.00231965	2foldUP	NA	12	3
Slc4a5	1.09801	0.000599737	0.00207185	2foldUP	NA
Loxl1	1.10015	2e-08	1.33e-07	2foldUP	Yes	3	0
Pla2g3	1.10044	2.84e-53	1.44e-51	2foldUP	NA
Dnah1	1.10334	1.58e-16	2.11e-15	2foldUP	Yes	1	0
Tmprss3	1.10342	1.25e-07	7.55e-07	2foldUP	NA	1	0
Rfx2	1.10371	5.23e-10	4.14e-09	2foldUP	Yes	6	1
Pld2	1.10481	1.23e-87	1.23e-85	2foldUP	Yes	6	2
Cilp2	1.10634	5.24e-05	0.000219227	2foldUP	Yes
Dnah9	1.10699	2.51e-38	8.52e-37	2foldUP	Yes	2	0
E030019B06Rik	1.10774	3.95e-09	2.84e-08	2foldUP	NA	7	1
4930412C18Rik	1.10798	0.000374299	0.00134581	2foldUP	Yes	2	0
Slc25a34	1.11137	3e-16	3.96e-15	2foldUP	Yes
Casp12	1.11188	3.38e-05	0.000146587	2foldUP	NA
Pcsk9	1.11249	1.61e-05	7.36e-05	2foldUP	NA	3	1
Kif9	1.11419	1.59e-19	2.54e-18	2foldUP	NA
Rd3	1.1144	0.000891124	0.00297935	2foldUP	Yes	4	3
Pifo	1.12558	1.39e-07	8.38e-07	2foldUP	Yes	1	0
Ccdc151	1.1261	1.7e-07	1.01e-06	2foldUP	NA
Id4	1.1317	6.47e-34	1.91e-32	2foldUP	Yes	4	0
Mgl2	1.13181	3.91e-05	0.000167094	2foldUP	NA
Ebf3	1.13363	2.17e-06	1.12e-05	2foldUP	NA	13	12
Gpr179	1.13725	1.42e-05	6.55e-05	2foldUP	NA
Fam166b	1.13799	2.75e-05	0.000121206	2foldUP	NA	6	4
Pappa	1.13804	5.23e-05	0.000219004	2foldUP	Yes	5	1
Spag6	1.13925	2.23e-11	2.01e-10	2foldUP	Yes
B930025P03Rik	1.14045	0.00296922	0.00885603	2foldUP	Yes
Met	1.14055	4.13e-10	3.31e-09	2foldUP	Yes	2	0
Zfp808	1.14316	0.000665902	0.0022783	2foldUP	NA
Matn2	1.14357	9.7e-61	5.5e-59	2foldUP	Yes
1700028P14Rik	1.14517	6.3e-06	3.06e-05	2foldUP	NA
Zxdb	1.14835	7.27e-05	0.000297391	2foldUP	NA
G530011O06Rik	1.15089	2.39e-08	1.57e-07	2foldUP	Yes
Pih1d2	1.15495	1.22e-05	5.69e-05	2foldUP	Yes
Sec14l3	1.15612	3.89e-10	3.13e-09	2foldUP	NA	1	0
Acot5	1.15716	0.000180294	0.000690242	2foldUP	Yes
Dlx1	1.16089	3.85e-36	1.22e-34	2foldUP	Yes	1	2
Nme9	1.16258	3.03e-06	1.54e-05	2foldUP	NA	1	1
Smim5	1.16348	0.000252573	0.000941439	2foldUP	Yes
E230008N13Rik	1.16521	4.72e-11	4.14e-10	2foldUP	NA
Ankrd45	1.16847	1.52e-39	5.44e-38	2foldUP	NA
Glb1l2	1.1699	1.28e-05	5.91e-05	2foldUP	Yes	2	2
Mettl20	1.17102	6.82e-08	4.28e-07	2foldUP	NA	4	1
4921536K21Rik	1.1771	0.000139039	0.000541909	2foldUP	NA
1700001L19Rik	1.17842	1.39e-09	1.06e-08	2foldUP	NA	5	1
Alx3	1.18075	0.000557972	0.00193872	2foldUP	NA
Arhgap28	1.18331	3.1e-12	3e-11	2foldUP	Yes	1	0
Znf41-ps	1.18341	9.72e-09	6.69e-08	2foldUP	NA
Mycbpap	1.18356	6.18e-10	4.86e-09	2foldUP	Yes	0	1
Armc3	1.18371	1.54e-12	1.53e-11	2foldUP	Yes
Draxin	1.1852	7.23e-29	1.79e-27	2foldUP	Yes	1	0
Igfbpl1	1.1867	1.32e-22	2.52e-21	2foldUP	NA	3	1
Tmem212	1.19275	4.04e-16	5.27e-15	2foldUP	NA
Gm13139	1.19453	6.95e-08	4.35e-07	2foldUP	NA
Capsl	1.19492	4.48e-11	3.94e-10	2foldUP	NA
Dnah2	1.19616	4.84e-30	1.25e-28	2foldUP	NA	2	1
Gm11992	1.19699	8.84e-13	8.94e-12	2foldUP	Yes
Fam154b	1.20318	2.11e-06	1.1e-05	2foldUP	NA
Igsf9	1.21217	2e-12	1.97e-11	2foldUP	Yes	9	3
Wdr27	1.21283	0.000293802	0.00107797	2foldUP	NA
Nhlh2	1.21476	5.84e-05	0.000241998	2foldUP	NA	1	0
Nme5	1.21532	3.73e-14	4.24e-13	2foldUP	NA
Catip	1.21837	1.31e-10	1.1e-09	2foldUP	Yes	3	1
Enkur	1.21998	4.71e-16	6.08e-15	2foldUP	NA
3930402G23Rik	1.21998	0.000851824	0.00285991	2foldUP	NA	7	2
Synpo2	1.2208	3.1e-10	2.51e-09	2foldUP	Yes	1	0
Fank1	1.22099	2.46e-07	1.44e-06	2foldUP	NA	2	1
Wdr63	1.22421	1.3e-15	1.64e-14	2foldUP	Yes	3	0
Dynlrb2	1.2293	4.17e-14	4.71e-13	2foldUP	Yes
Sctr	1.22965	2.4e-06	1.23e-05	2foldUP	NA
Tmem232	1.23318	3.23e-07	1.86e-06	2foldUP	Yes	3	2
Tekt4	1.23923	5.07e-06	2.5e-05	2foldUP	Yes	16	13
Mir7646	1.24134	0.000144565	0.00056208	2foldUP	NA
Dlec1	1.24296	1.06e-13	1.16e-12	2foldUP	Yes	2	0
Iqca	1.24389	4.9e-09	3.48e-08	2foldUP	Yes
Wdr96	1.24398	4.5e-21	7.98e-20	2foldUP	NA	1	0
Ccdc39	1.24648	4.72e-42	1.81e-40	2foldUP	NA	0	1
Klhdc9	1.24697	1.9e-05	8.57e-05	2foldUP	Yes	2	1
Gulp1	1.24786	1.94e-15	2.41e-14	2foldUP	Yes
4930451C15Rik	1.25102	6.37e-17	8.75e-16	2foldUP	NA
Ppp1r32	1.25314	1.67e-10	1.39e-09	2foldUP	NA	3	2
Dnajb13	1.25576	5.72e-06	2.8e-05	2foldUP	NA	1	0
Myb	1.25779	1.88e-15	2.35e-14	2foldUP	Yes
Musk	1.26151	1.11e-21	2.03e-20	2foldUP	NA	0	1
A930017M01Rik	1.2638	5.56e-10	4.39e-09	2foldUP	NA
Wdr78	1.2643	1.47e-20	2.51e-19	2foldUP	NA
Slc17a6	1.26513	4.06e-10	3.26e-09	2foldUP	Yes	12	4
Crygn	1.26652	1.05e-05	4.92e-05	2foldUP	NA	3	0
Dmkn	1.26841	2.18e-09	1.62e-08	2foldUP	Yes	0	1
Anxa8	1.27259	7.6e-06	3.64e-05	2foldUP	NA	2	0
Ccdc37	1.27266	4.41e-28	1.07e-26	2foldUP	NA	9	2
Cdkl4	1.27459	1.45e-19	2.32e-18	2foldUP	Yes
Ttpa	1.27705	5.9e-13	6.06e-12	2foldUP	Yes
Rsph4a	1.27792	2.12e-29	5.4e-28	2foldUP	NA
Hc	1.27818	7.94e-10	6.19e-09	2foldUP	NA
Kif27	1.28287	4.27e-11	3.76e-10	2foldUP	NA	1	1
Ccdc11	1.28316	2.32e-06	1.19e-05	2foldUP	NA
Lrrc9	1.28359	4.53e-12	4.34e-11	2foldUP	Yes	4	1
Fbxl13	1.28529	0.000593848	0.00205335	2foldUP	Yes
Lrrc6	1.28744	3.38e-05	0.000146374	2foldUP	NA
A2m	1.28991	2.48e-28	6.06e-27	2foldUP	NA
Ubxn10	1.29355	3.73e-14	4.23e-13	2foldUP	NA	12	3
1700026D08Rik	1.29358	5.16e-10	4.09e-09	2foldUP	NA	1	1
B3gnt6	1.29722	0.000258847	0.00096128	2foldUP	NA	3	0
1700007K13Rik	1.29794	2.46e-08	1.62e-07	2foldUP	NA
Slc2a4	1.29935	4.05e-05	0.000172536	2foldUP	Yes
Ccdc19	1.30143	4.39e-13	4.57e-12	2foldUP	NA	8	7
Hdc	1.30525	6.91e-22	1.28e-20	2foldUP	NA
Adamts14	1.30908	0.000118914	0.000468509	2foldUP	NA	1	0
Sox1	1.31317	1.72e-22	3.27e-21	2foldUP	NA	5	1
Pkdrej	1.31516	3.25e-05	0.000141133	2foldUP	NA	1	0
Erich2	1.31714	9.09e-08	5.6e-07	2foldUP	Yes	3	0
Vwa3a	1.31722	1.15e-32	3.28e-31	2foldUP	NA	3	2
Tmem47	1.31775	1.25e-69	8.55e-68	2foldUP	Yes	1	0
Cacna1s	1.32339	6.29e-05	0.000259296	2foldUP	NA
Dnah6	1.32507	1.68e-46	7.15e-45	2foldUP	NA	3	5
Bdh2	1.32588	9.46e-09	6.52e-08	2foldUP	Yes	5	3
Ccdc33	1.32686	1.2e-12	1.2e-11	2foldUP	NA	1	0
Gm1661	1.3295	1.7e-06	8.92e-06	2foldUP	Yes
Ebf2	1.33259	8.11e-06	3.87e-05	2foldUP	Yes	3	2
Arhgef33	1.33476	5.77e-06	2.82e-05	2foldUP	NA
Ccdc108	1.33522	2.35e-53	1.19e-51	2foldUP	Yes
Hydin	1.33653	1.62e-38	5.56e-37	2foldUP	NA
Dnaaf1	1.33663	4.5e-05	0.00019031	2foldUP	NA
Wdr52	1.33803	3.57e-45	1.47e-43	2foldUP	NA
Iyd	1.3415	5.61e-06	2.75e-05	2foldUP	NA	13	6
Zmynd10	1.34161	3.06e-13	3.23e-12	2foldUP	Yes
2410004P03Rik	1.34178	5.26e-30	1.36e-28	2foldUP	Yes	6	1
Ppil6	1.34399	3.04e-14	3.48e-13	2foldUP	Yes
Lrguk	1.34422	6.09e-08	3.85e-07	2foldUP	Yes	1	0
Morn3	1.35239	9.29e-05	0.000371918	2foldUP	Yes	5	4
Ankrd66	1.3563	6.4e-06	3.11e-05	2foldUP	NA
E030003E18Rik	1.35842	1.22e-17	1.76e-16	2foldUP	NA	1	0
Ccdc103	1.35994	1.22e-05	5.68e-05	2foldUP	NA
Got1l1	1.36581	1.57e-13	1.7e-12	2foldUP	Yes	0	1
Aldh1a1	1.36754	7.07e-83	6.32e-81	2foldUP	NA
Aass	1.37025	2.06e-06	1.07e-05	2foldUP	NA
Efcab12	1.37217	6.04e-14	6.78e-13	2foldUP	Yes	2	1
Arhgap36	1.37224	0.000784112	0.00264784	2foldUP	NA
Lrriq1	1.37893	1.88e-10	1.55e-09	2foldUP	NA
Odf3b	1.38094	2.32e-13	2.48e-12	2foldUP	NA
Ccdc135	1.38274	3.92e-17	5.45e-16	2foldUP	NA
1700016K19Rik	1.39019	2.84e-10	2.31e-09	2foldUP	Yes	2	0
1700007G11Rik	1.39157	7.35e-06	3.54e-05	2foldUP	Yes	10	2
Agbl2	1.39174	2.25e-07	1.32e-06	2foldUP	NA
Fam183b	1.39637	1.25e-12	1.25e-11	2foldUP	NA
Neurod1	1.40204	1.29e-13	1.41e-12	2foldUP	NA	4	1
Sp8	1.40375	3.37e-06	1.7e-05	2foldUP	NA	11	4
Scml4	1.41762	2.4e-09	1.77e-08	2foldUP	NA	3	0
Fam179a	1.42479	1.84e-12	1.82e-11	2foldUP	Yes	3	0
Mapk15	1.43077	1.98e-16	2.63e-15	2foldUP	NA
1700040L02Rik	1.43376	6.65e-09	4.65e-08	2foldUP	NA
Wdr16	1.43716	1.49e-21	2.71e-20	2foldUP	NA
Gm19522	1.4404	7.46e-05	0.000304048	2foldUP	NA	11	4
Foxj1	1.44911	9.86e-40	3.56e-38	2foldUP	Yes	5	3
1600029I14Rik	1.4538	8.53e-05	0.000344136	2foldUP	Yes	0	2
Syt2	1.45753	0.00222524	0.00683658	2foldUP	NA	7	0
Vit	1.46155	3.25e-29	8.24e-28	2foldUP	NA	2	1
Dnali1	1.46354	7.83e-18	1.15e-16	2foldUP	Yes
Prrg4	1.48216	5.48e-10	4.33e-09	2foldUP	Yes
Cd109	1.48318	2.11e-25	4.63e-24	2foldUP	NA	0	1
Insm1	1.4861	1.62e-07	9.66e-07	2foldUP	Yes	1	0
Lrrc36	1.48851	9.78e-11	8.34e-10	2foldUP	NA
Abca8a	1.48955	4.5e-17	6.24e-16	2foldUP	NA
Ttll6	1.49325	7.34e-13	7.48e-12	2foldUP	Yes
Ttc21a	1.49391	3.55e-35	1.09e-33	2foldUP	NA
Scnn1a	1.49439	1.38e-20	2.37e-19	2foldUP	NA
Tctex1d4	1.50055	3.87e-07	2.21e-06	2foldUP	NA
Slc26a4	1.50127	2.81e-05	0.000123797	2foldUP	Yes
Zfp474	1.50173	6.49e-14	7.25e-13	2foldUP	NA
1700001C02Rik	1.50887	2.22e-06	1.15e-05	2foldUP	NA
BC051019	1.5093	5.11e-05	0.000214272	2foldUP	NA
Ak7	1.51144	3.26e-48	1.45e-46	2foldUP	NA
Trp73	1.517	3.75e-22	7.02e-21	2foldUP	NA
Fsip1	1.5192	4.77e-06	2.36e-05	2foldUP	NA	0	1
Gas2l2	1.52221	2.46e-07	1.44e-06	2foldUP	NA	5	6
Efhc2	1.52436	1.65e-06	8.69e-06	2foldUP	NA
Daw1	1.52663	1.96e-14	2.27e-13	2foldUP	NA
Fhad1	1.52761	4.13e-14	4.66e-13	2foldUP	NA	6	2
Dyrk3	1.53411	3.21e-15	3.95e-14	2foldUP	Yes	1	0
1700012B09Rik	1.53622	2.75e-07	1.6e-06	2foldUP	NA	2	1
Ttc29	1.53969	1.05e-08	7.2e-08	2foldUP	NA	1	0
Lrrc43	1.54354	1.6e-09	1.2e-08	2foldUP	NA	2	1
1700003M02Rik	1.54379	1.58e-17	2.25e-16	2foldUP	NA
Tnni3	1.54983	7.8e-06	3.73e-05	2foldUP	Yes	5	0
Ccdc146	1.55399	7.12e-17	9.76e-16	2foldUP	NA
Lgals3	1.55612	6.56e-09	4.6e-08	2foldUP	NA
Ccdc81	1.55722	7.2e-14	8.01e-13	2foldUP	NA	6	0
Akr1b8	1.56093	4.09e-07	2.33e-06	2foldUP	Yes
Lrrc23	1.56294	3.81e-39	1.34e-37	2foldUP	Yes	1	0
Cybrd1	1.58002	1.32e-75	1.03e-73	2foldUP	NA
4930529M08Rik	1.58459	3.22e-07	1.86e-06	2foldUP	NA
Scn7a	1.59148	3e-13	3.18e-12	2foldUP	NA	1	0
Iqub	1.59642	1.31e-11	1.21e-10	2foldUP	Yes
Armc4	1.59837	1.32e-16	1.78e-15	2foldUP	NA
Dpy19l2	1.60406	1.4e-09	1.06e-08	2foldUP	NA	3	1
Ddo	1.60412	1.11e-19	1.8e-18	2foldUP	Yes	0	1
Fam216b	1.63518	1.07e-28	2.64e-27	2foldUP	NA
Ccdc170	1.63856	7.02e-17	9.62e-16	2foldUP	NA
Pipox	1.64546	6.02e-10	4.74e-09	2foldUP	Yes	3	0
Mak	1.65155	1.38e-05	6.35e-05	2foldUP	NA	3	1
Ttc16	1.65809	1.17e-19	1.9e-18	2foldUP	NA
Ccdc60	1.66093	5.09e-10	4.04e-09	2foldUP	NA	0	1
Lrrc18	1.66159	8.76e-08	5.41e-07	2foldUP	NA	0	1
Tsnaxip1	1.66398	6.38e-14	7.13e-13	2foldUP	NA
Tcp11	1.66465	2.43e-08	1.6e-07	2foldUP	Yes	6	6
Tcte1	1.66878	1.86e-08	1.24e-07	2foldUP	NA
Crip3	1.67983	8.39e-08	5.19e-07	2foldUP	NA
Ttc18	1.68327	1.13e-19	1.83e-18	2foldUP	NA
9630028B13Rik	1.68918	3.78e-12	3.63e-11	2foldUP	Yes	1	0
Efhb	1.69024	5.51e-10	4.35e-09	2foldUP	NA
Mdh1b	1.69291	1.13e-05	5.3e-05	2foldUP	NA
Spag17	1.70382	8.96e-22	1.65e-20	2foldUP	NA
Gm6377	1.71581	1.59e-06	8.4e-06	2foldUP	NA
Ccdc113	1.71603	9.43e-13	9.52e-12	2foldUP	NA	2	0
Dsg2	1.72562	9.24e-13	9.33e-12	2foldUP	NA
Zbbx	1.72989	6.6e-08	4.15e-07	2foldUP	NA	2	1
Col2a1	1.7385	4.45e-68	2.96e-66	2foldUP	Yes
Gm17455	1.7625	9.72e-09	6.69e-08	2foldUP	Yes	14	6
Spag16	1.77366	7.43e-20	1.22e-18	2foldUP	NA
Gm867	1.78909	1.24e-18	1.89e-17	2foldUP	Yes
Spata18	1.7974	2.67e-26	6.06e-25	2foldUP	NA	2	0
4833427G06Rik	1.81144	6.48e-07	3.59e-06	2foldUP	NA
Nkx2-1	1.81649	6.88e-10	5.39e-09	2foldUP	NA
Ccno	1.87779	5.77e-12	5.47e-11	2foldUP	Yes	3	1
Ucma	1.89025	4.78e-11	4.19e-10	2foldUP	NA
Akap14	1.89233	1.67e-07	9.94e-07	2foldUP	Yes
C1qtnf3	1.92569	2.33e-11	2.1e-10	2foldUP	NA
Car9	1.94016	1.18e-30	3.12e-29	2foldUP	NA
Maats1	1.95806	1.35e-30	3.57e-29	2foldUP	NA	1	0
Lrrc71	1.96099	1.16e-39	4.19e-38	2foldUP	Yes	0	3
Plin5	2.11464	2.5e-09	1.84e-08	2foldUP	NA
Ccna1	2.12842	2.14e-10	1.76e-09	2foldUP	NA	1	1
Bbox1	2.16164	5.18e-18	7.66e-17	2foldUP	NA
Trpa1	2.36976	1.08e-08	7.4e-08	2foldUP	NA
Ccdc67	2.38697	3.07e-22	5.77e-21	2foldUP	Yes
Sgcg	2.49894	2.67e-10	2.17e-09	2foldUP	NA
Wisp2	3.02391	5.38e-18	7.95e-17	2foldUP	NA	0	1
